# Supplementary material for: A towering genome: Experimentally validated adaptations to high blood pressure and extreme stature in the giraffe
Source: PubMed Central journal article supplement — Sci Adv. 2021 Mar 17;7(12):eabe9459. doi: 10.1126/sciadv.abe9459 (PMC7968835; doi:10.1126/sciadv.abe9459), 2021-03-17
Supplement: abe9459_SM.pdf [file abe9459_SM.pdf]

advances.sciencemag.org/cgi/content/full/7/12/eabe9459/DC1

## Supplementary Materials for

### **A towering genome: Experimentally validated adaptations to high blood pressure and extreme stature in the giraffe**

Chang Liu, Jianbo Gao, Xinxin Cui, Zhipeng Li, Lei Chen, Yuan Yuan, Yaolei Zhang, Liangwei Mei, Lan Zhao, Dan Cai, Mingliang Hu, Botong Zhou, Zihe Li, Tao Qin, Huazhe Si, Guangyu Li, Zeshan Lin, Yicheng Xu, Chenglong Zhu, Yuan Yin, Chenzhou Zhang, Wenjie Xu, Qingjie Li, Kun Wang, M. Thomas P. Gilbert, Rasmus Heller\*, Wen Wang\*, Jinghui Huang\*, Qiang Qiu\*

\*Corresponding author: Email: qiuqiang@lzu.edu.cn (Q.Q.); huangjh@fmmu.edu.cn (J.H.);  
wwang@mail.kiz.ac.cn (W.W.); rheller@bio.ku.dk (R.H.)

Published 17 March 2021, *Sci. Adv.* 7, eabe9459 (2021)  
DOI: 10.1126/sciadv.abe9459

#### **This PDF file includes:**

Figs. S1 to S23  
Tables S1 to S22  
References

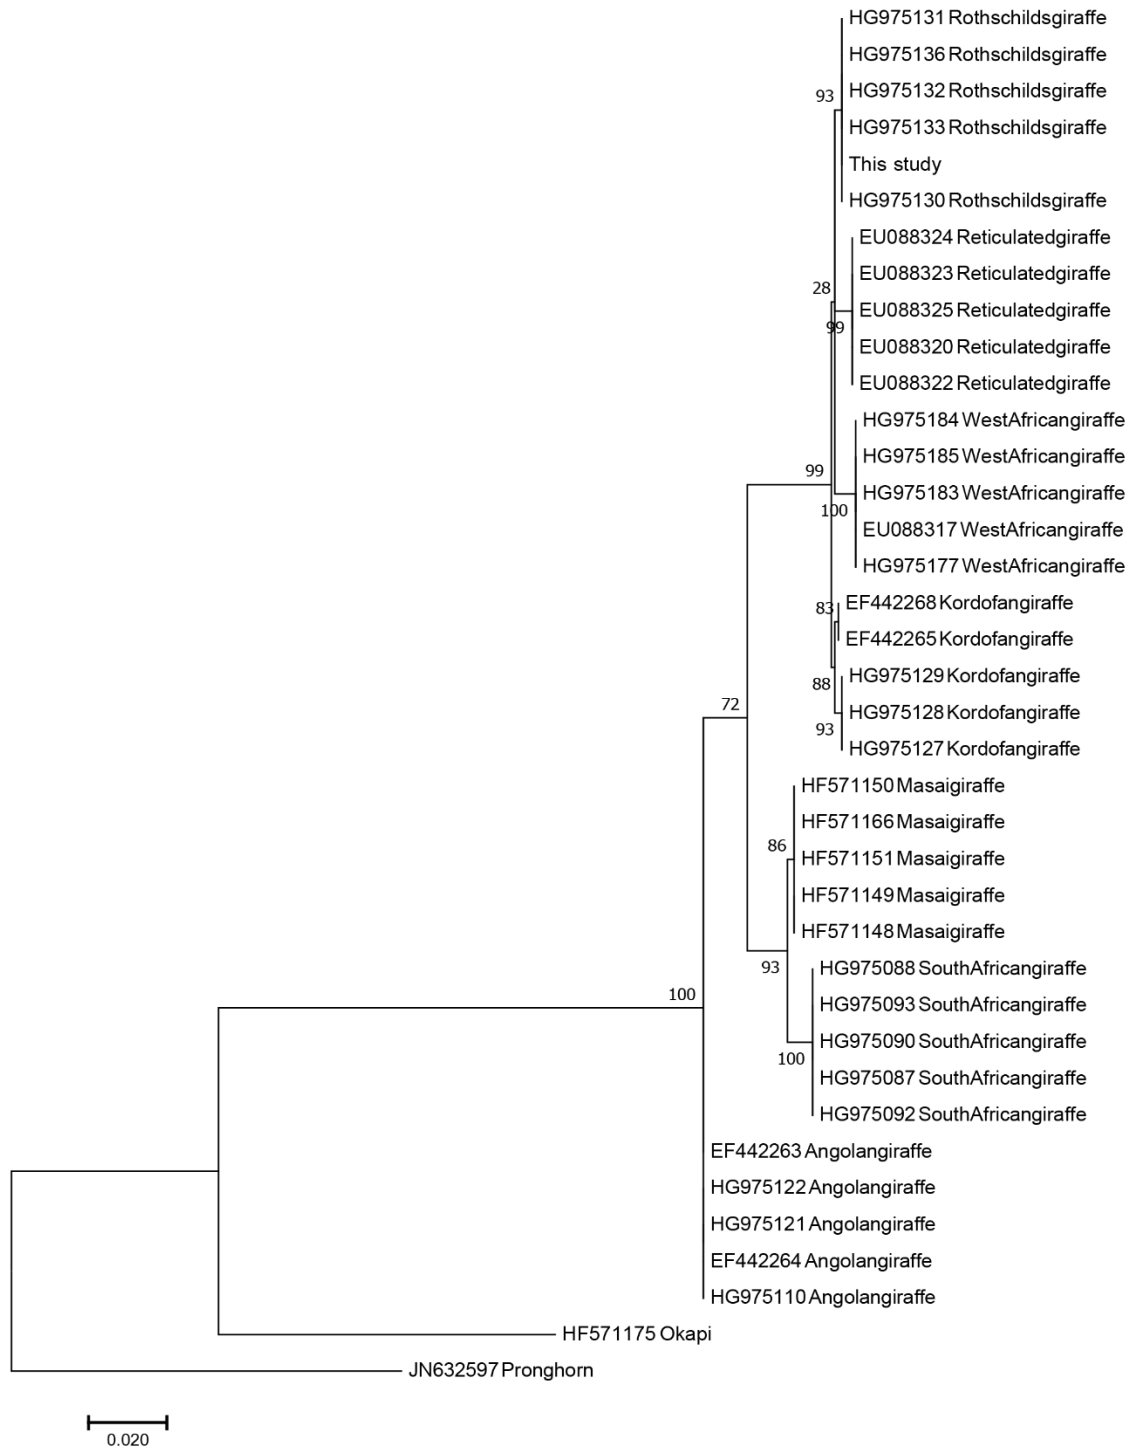

**Fig. S1| Taxonomic identification based on cytochrome b (*Cytb*) gene.** *Cytb* sequences of 160 giraffe individuals and two out group species from the previous study (56) were used for analysis, and we showed only five giraffe individuals for each population here. The phylogenetic tree suggests our sample (This study) is highly similar to other Rothschild’s giraffes with high support (UFB value=93).

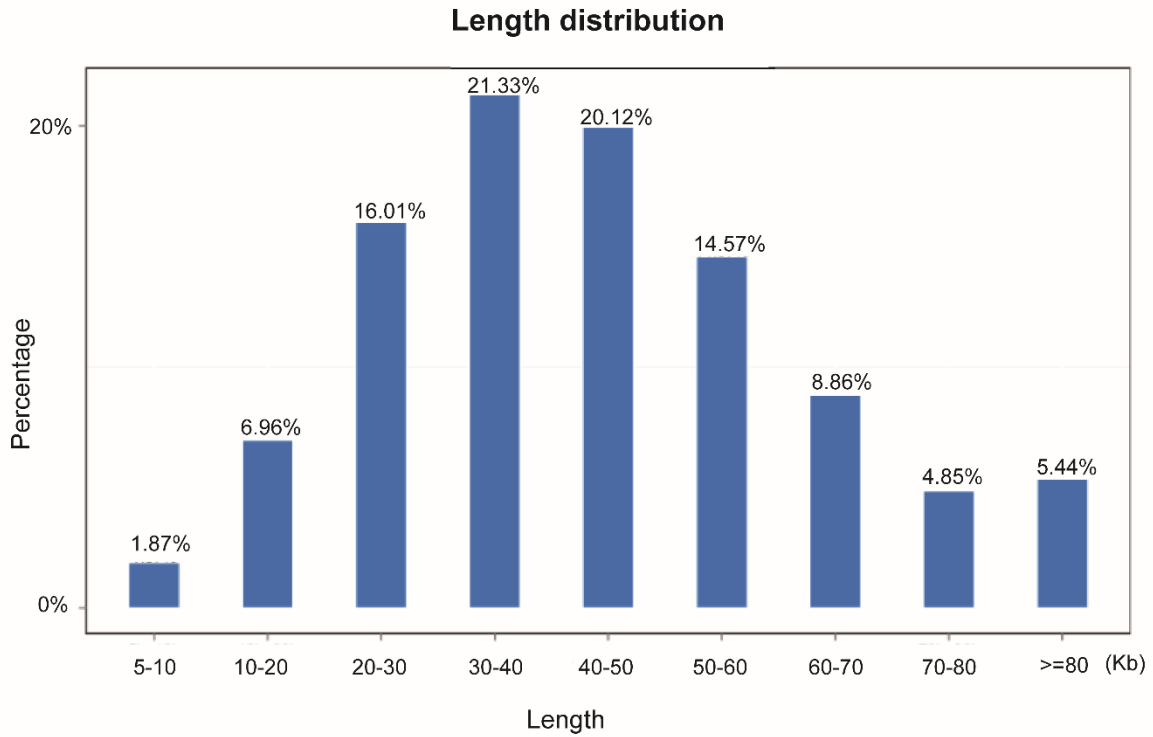

**Fig. S2 | The length distribution of filtered Oxford Nanopore long-reads.** We obtained 140.56 Gb clean data (4,124,698 clean reads), with an average length of 34,078 bp, max length of 1,043,973 bp and N50 length of 41,773 bp.

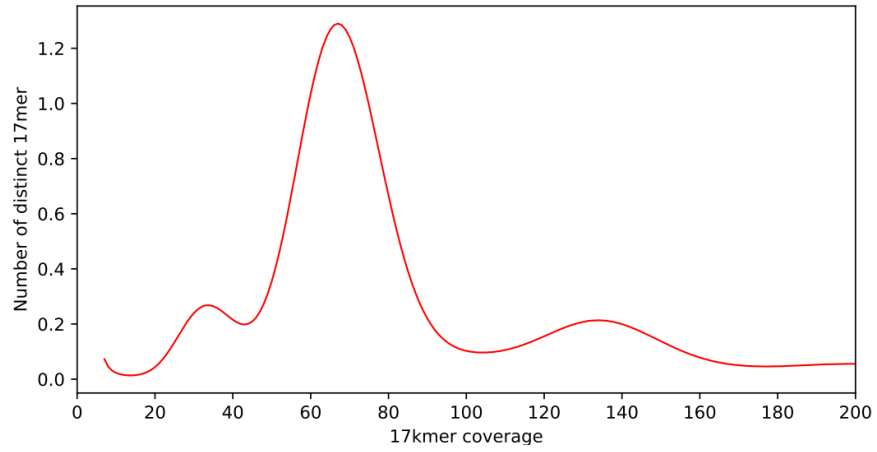

**Fig. S3 | *K*-mer (k=17) distribution of the giraffe genome.** The estimated genome size, based on 17-mer analysis, is 2.54 Gb, with estimated heterozygosity of 0.003.

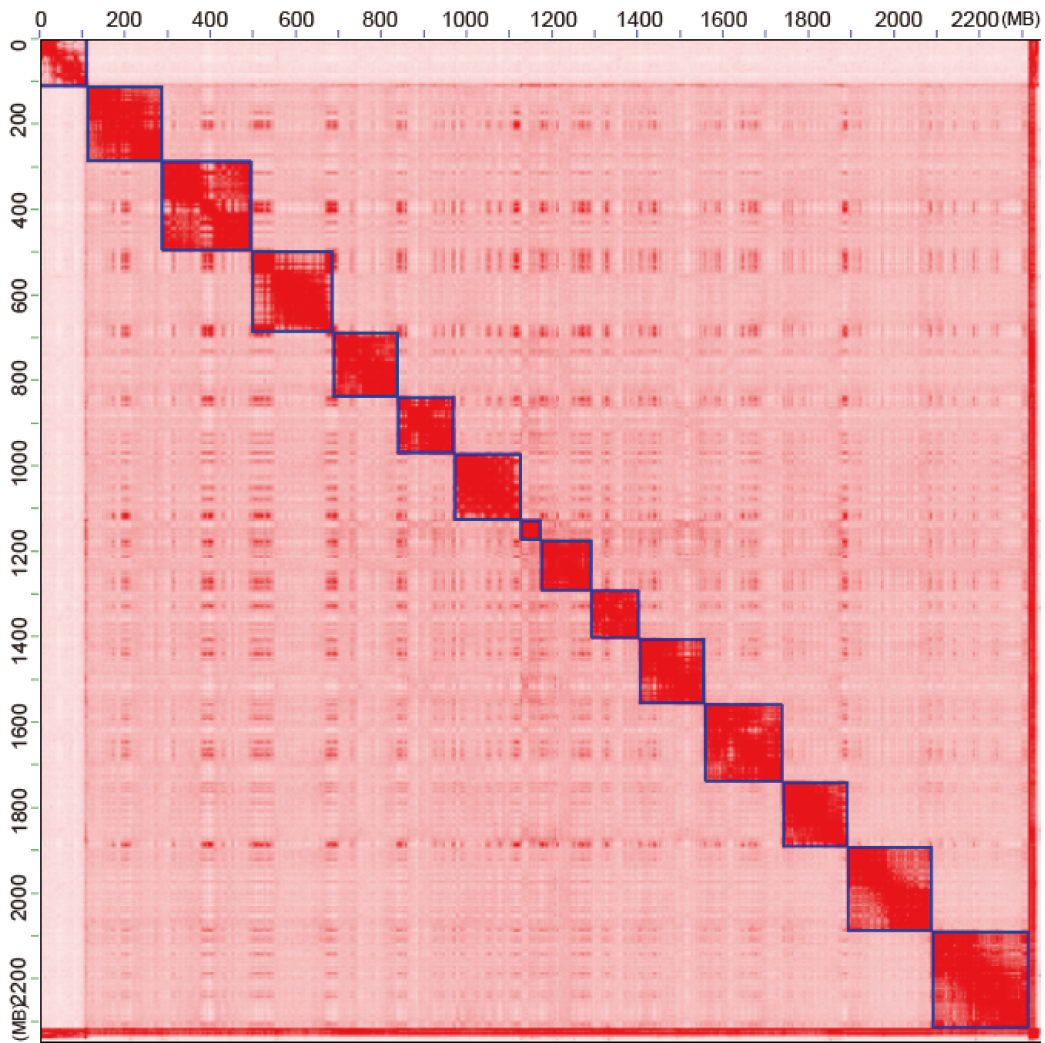

**Fig. S4| Hi-C linkage density heat map of the giraffe chromosome assembly.** It shows that edges of chromosomes are very clear.

**A**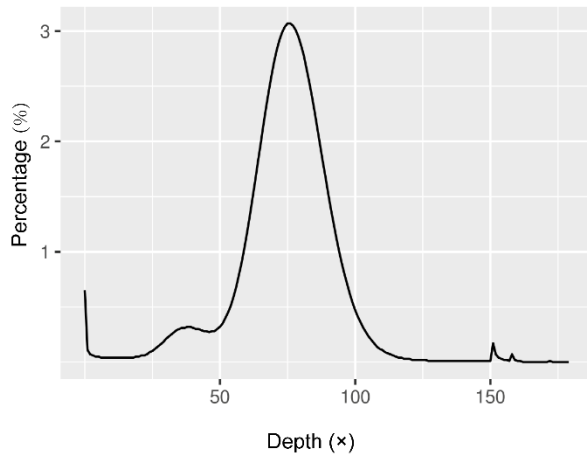**B**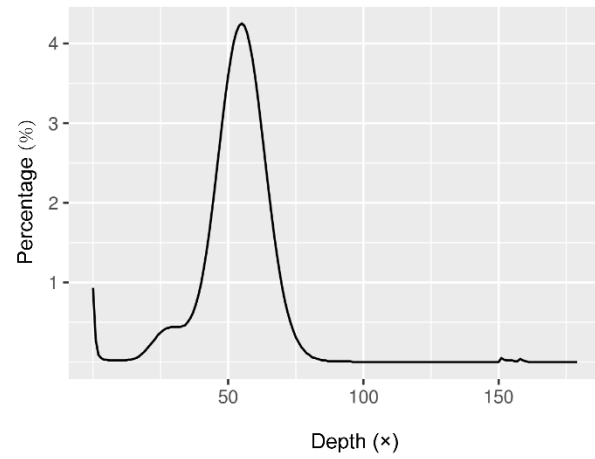

**Fig. S5| Distributions of read depth across the giraffe genome.** Both the Illumina Hiseq and Nanopore reads used for genome assembly were mapped back to the genome. Average mapping depths of the Illumina (**A**) and Nanopore reads (**B**) are  $79\times$  and  $54\times$ , respectively.

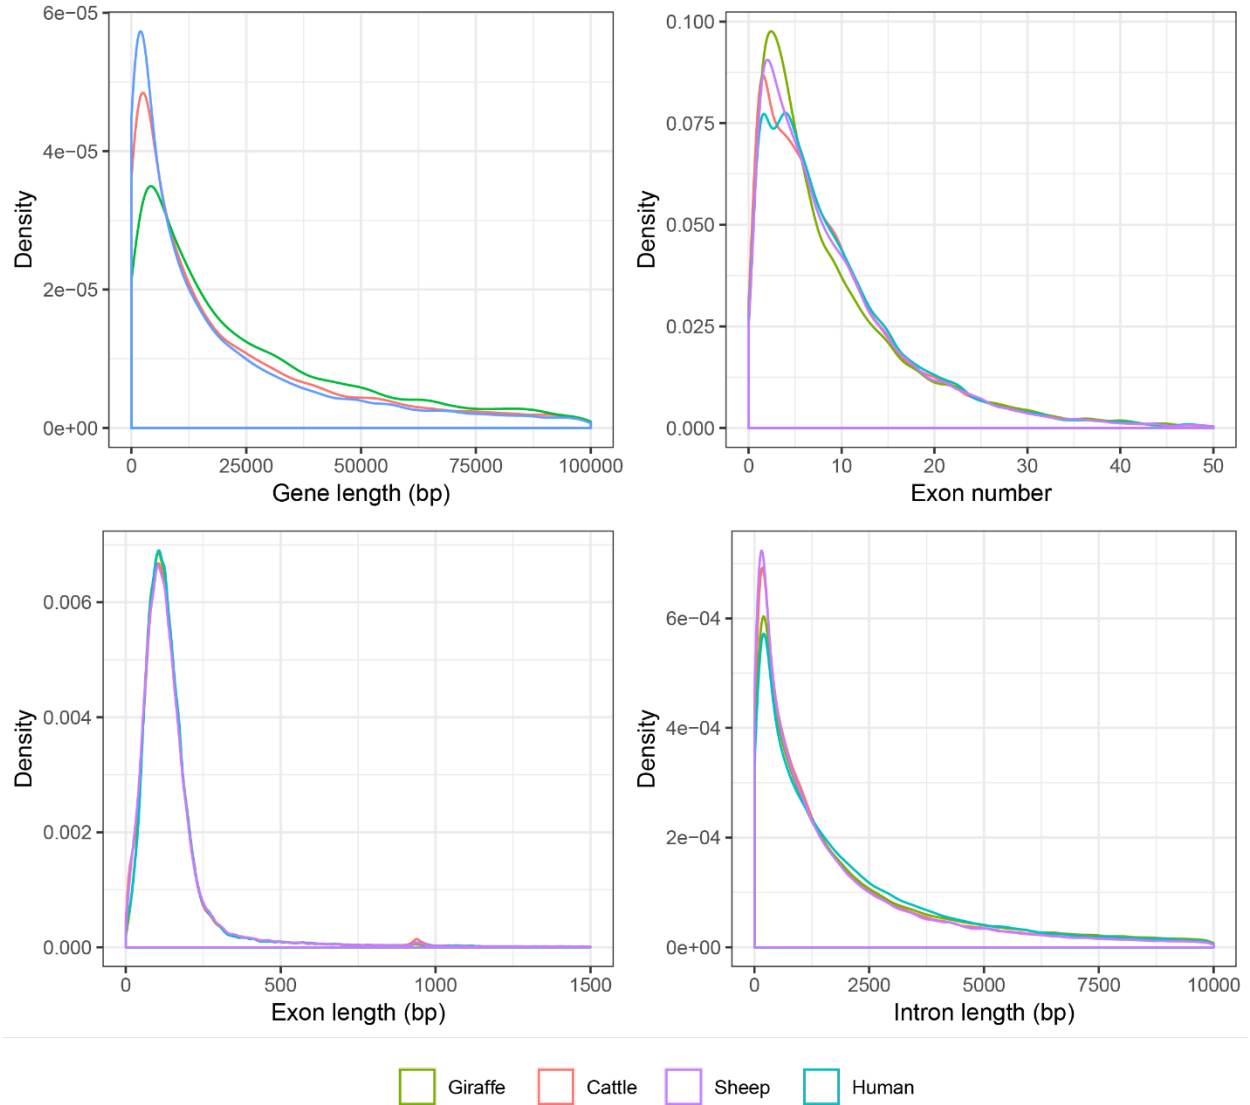

**Fig. S6| Evaluation of gene annotations.** Gene length (A), exon number (B), exon length (C), and intron length (D) per gene among coding genes of giraffe, sheep, cattle, and human genomes are presented. The x-axes indicate lengths or numbers of genes, exons or introns, and y-axes represent their kernel densities. The similarities between these variables of our giraffe genome and published other mammal's genomes indicate that our assembly and annotation have high quality.

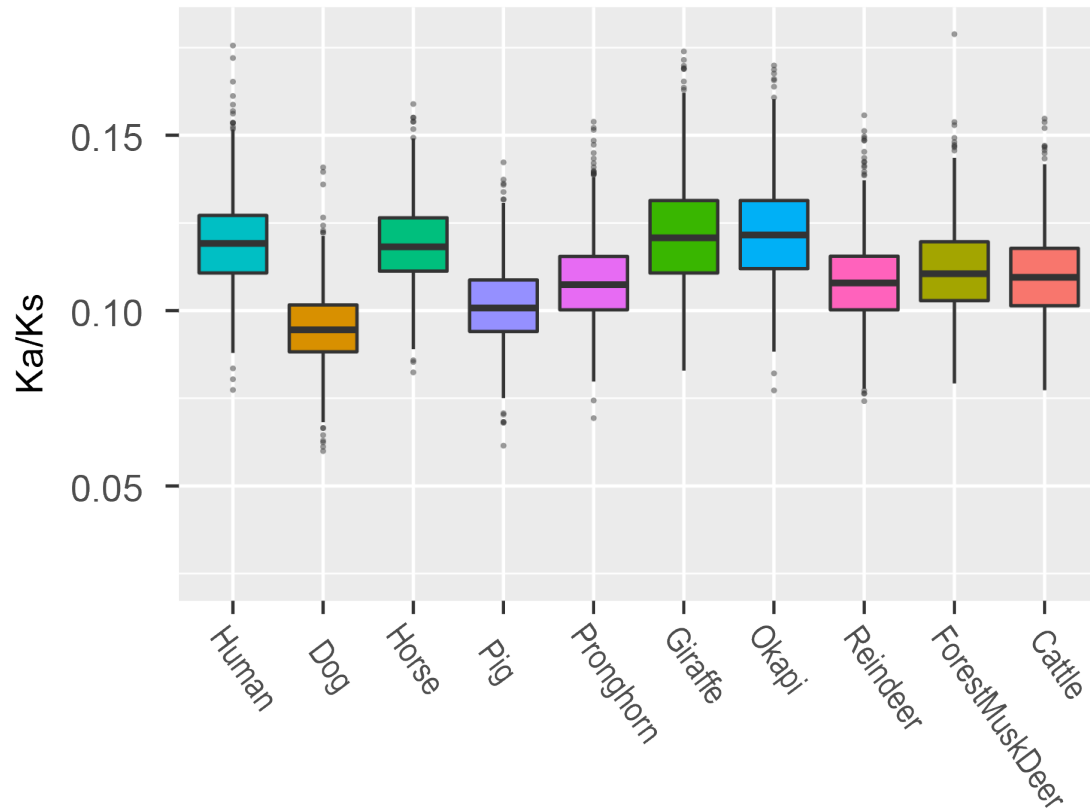

**Fig. S7| The boxplot of Ka/Ks ratios across 10 species used for PAML analysis.** For each species, the black line in the middle indicates the median value, while the lower and upper hinges correspond to the first and third quantiles (25<sup>th</sup> and 75<sup>th</sup> percentiles).



**A** MRE11A ENSBTAT00000011748

647

|                |                |           |
|----------------|----------------|-----------|
| Human          | TKNYSEVIEVDES  | DVEEDIFP  |
| Dog            | TKNYSEVIEVDES  | DVEEDIFP  |
| Horse          | TKNYSEVMEVDES  | DVEDNIFP  |
| Pig            | PKNYSEVIEVDES  | DTEEDIFP  |
| Pronghorn      | TKNYTEVIEVEDES | EETEEDVFL |
| Giraffe        | TKNYTEVIEVSES  | DTEEDIFL  |
| Okapi          | TKNYTEVIEVDES  | DTEEDIFL  |
| Reindeer       | TKNYTEVIEVDES  | DTEEDIFL  |
| ForestMuskDeer | TKNYTEVIEVDES  | DTEEDIFL  |
| Cattle         | TKNYTEVIEVDES  | DTEEDVFL  |

**B** SLC16A1 ENSBTAT00000020102

|                |             |  |               |           |
|----------------|-------------|--|---------------|-----------|
|                | 192         |  | 324           | 335       |
| Human          | NCCVAGALMRP |  | VANTKPIRPRIQY | FFAASVVAN |
| Dog            | NCCVAGALMRP |  | VANTKWIRPRVQY | FFAASIVAN |
| Horse          | NCCVAGALMRP |  | VANTKWIRPRVQY | FFAASIVAN |
| Pig            | NCCVAGALMRP |  | VANTKWIRPRVQY | FFAASIIAN |
| Pronghorn      | NCCVAGALMRP |  | VANTKWIRPRVQY | FFAASIIAN |
| Giraffe1       | NCCVAEALMRP |  | VANTKRIRPRVQY | FFAPSIIAN |
| Giraffe2       | NCCVAGALMRP |  | VANTKWIRPRVQY | FFAASIIAN |
| Giraffe3       | NCCVAGALMRP |  | VANTKWIRPRVQY | FFAASIIAN |
| Giraffe4       | NCCVAGALMRP |  | VANTKWIRPRVQY | FFAASIIAN |
| Okapi          | NCCVAGALMRP |  | VANTKWIRPRVQY | FFAASIVAN |
| Reindeer       | NCCVAGALMRP |  | VANTKWVRPRVQY | FFAASIIAN |
| ForestMuskDeer | NCCVAGALMRP |  | VANTKWIRPRVQY | FFAASIIAN |
| Cattle         | NCCVAGALMRP |  | VANTKWVRPRVQY | FFAASIIAN |

**Fig. S8|Two false positive cases of the genes exhibiting adaptation in giraffe that have been reported by a previous study (7). (A)** D647S was thought to be positively selected in giraffe before, although this substitution of giraffe is unique, in our data set with more ruminant clades, the nearby amino acids are not conserve in another ruminant clade, pronghorn, neither. **(B)** All the potential damaging substitutions reported before in SLC16A1, including G192E, W324R and A335P (Giraffe1, (7)), cannot be verified by any other giraffe genomes (Giraffe2, (9); Giraffe3, (74); Giraffe4, this study).

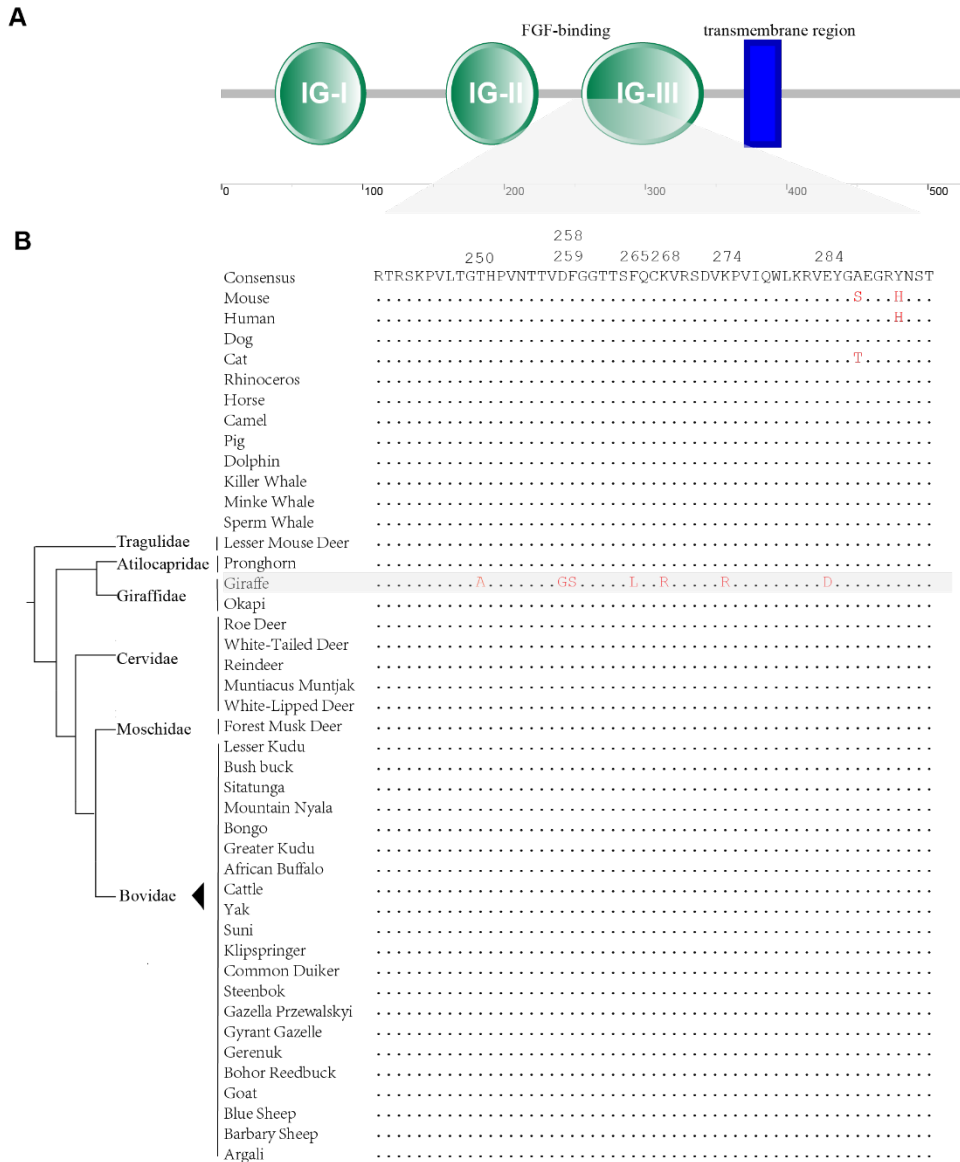

**Fig. S9| Multi-sequence alignments of FGFR1 proteins. (A)** Functional domain annotation of giraffe FGFR1 protein with online tool SMART(75) **(B)** Multi-sequence alignment around giraffe's seven unique substitutions in FGFR1 among mammals, with all ruminant sequences in good quality showed. Common type amino acids are showed in first line of the alignment with following same sites showed as dots and different sites showed in red. There are seven unique substitutions in giraffe including T250A, D258G, F259S, F265L, K268R, K274 and E284D. And these variants have been verified by all available giraffe data sets by now (7, 9, 56, 74).

**A***FGFRL1* (NM\_0540712)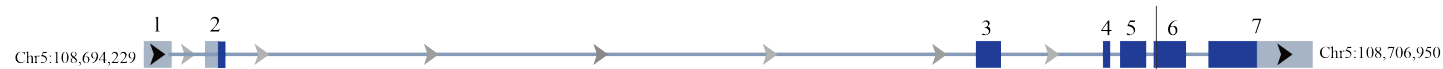**B**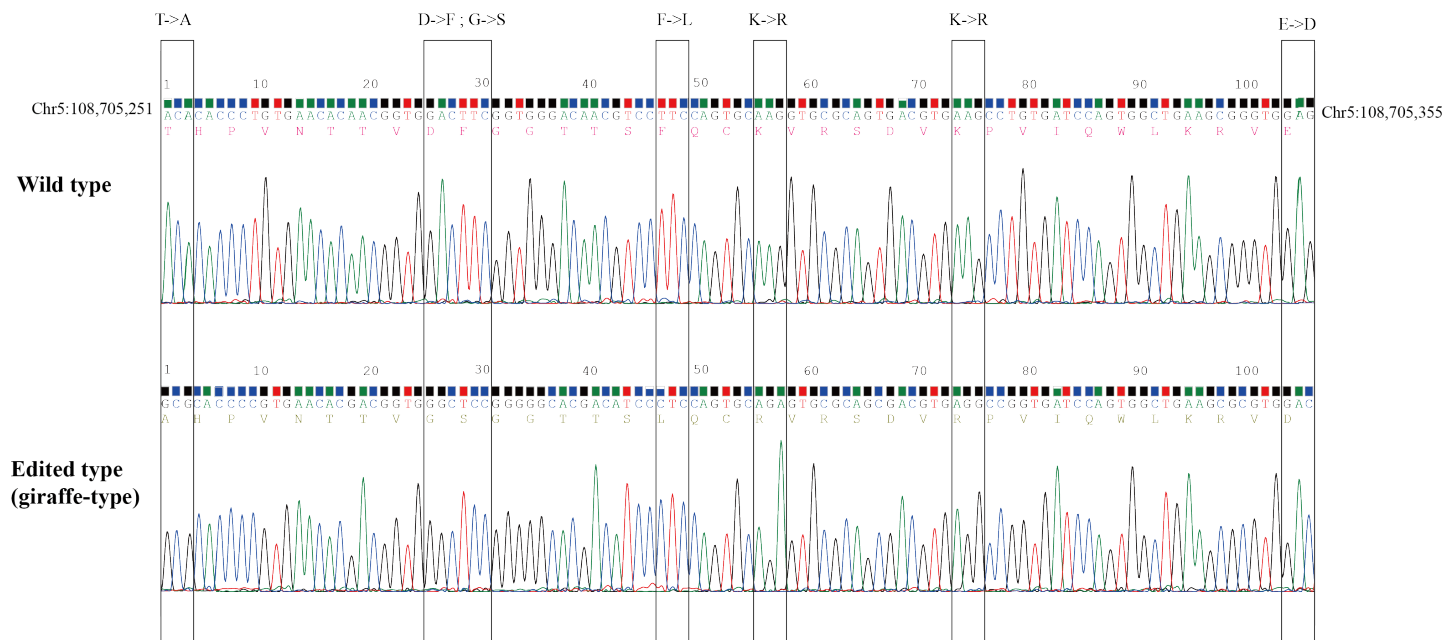

**Fig. S10| Generation of *FGFRL1* edited homozygous mutant mice (C57).** (A) Gene structure and location of *FGFRL1* in mice (GRCm38.p6). On exons, UTR regions are in light blue and CDS regions are in dark blue. The sites should be edited locate on the six exon. (B) PCR sequencing of the sites in edited type mice and wild type mice. It shows that all the seven sites in edited type mice have been changed to giraffe-type, and the all the sites are homozygous in both wild type and edited type mice.

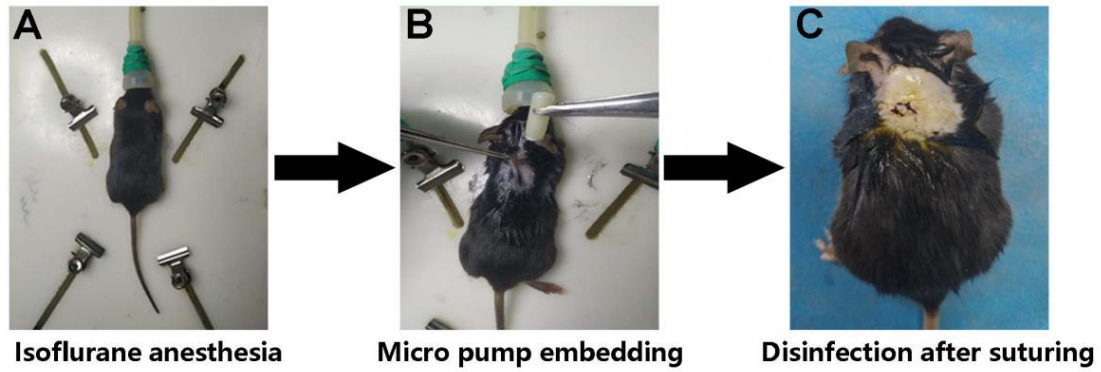

**Fig. S11| Establishment of hypertension model in WT and giraffe-type *FGFRL1* mice.** (A) Adult (16 weeks old, 24-26 g) WT (n=10) and giraffe-type *FGFRL1* mice (n=10) were immobilized and anesthetized with isoflurane (1% at 1.5 L/min oxygen). (B) A 1 cm incision on the back was then made by scissors and an Alzet-1004 osmotic mini-pump (Cupertino, CA) was embedded, providing Ang II (900 ng/kg/min at an infusion rate of 10  $\mu$ l/hr) or equivalent saline. (C) The skin incision was sutured and disinfected. Photo Credit: Jianbo Gao, The Fourth Military Medical University.

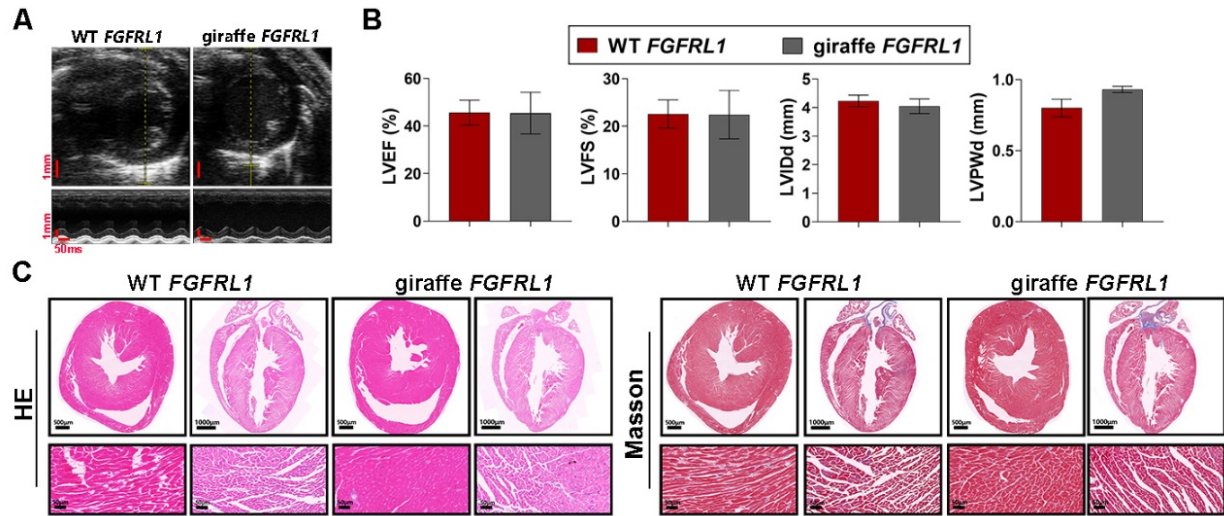

**Fig. S12** | No sign of defects was found in heart function and histology of giraffe-type *FGFR1* mice. **(A)** Echocardiographic images of adult WT *FGFR1* and giraffe-type *FGFR1* mice. **(B)** No significant difference was found in left ventricular ejection fraction (LVEF), left ventricular fractional shortening (LVFS), left ventricular posterior wall thickness at end-diastole (LVPWd) and left ventricular internal diameter at end-diastole (LVIDd) between the WT *FGFR1* and giraffe-type *FGFR1* mice.  $n=4$ ,  $P>0.05$ , independent Student's *t*-test. **(C)** No sign of defects in cardiac histology in adult giraffe-type *FGFR1* mice were detected by HE and Masson trichrome staining either. Error bars indicate SD.

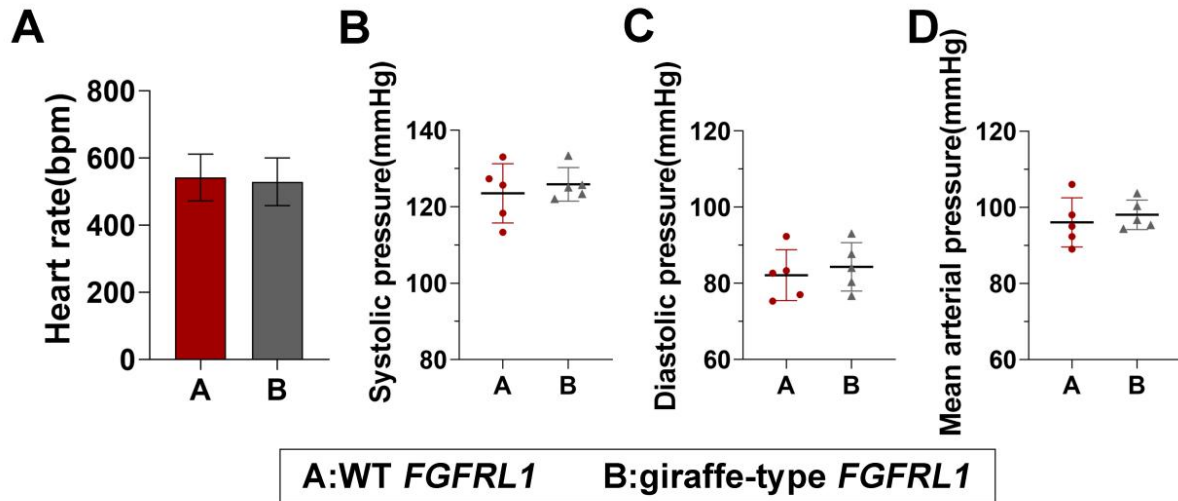

**Fig. S13|Baseline heart rate and blood pressure in giraffe-type *FGFR1* mice.** No significant differences in baseline heart rate (**A**) or basal blood pressures (**B**), systolic pressure; (**C**), diastolic pressure; (**D**), mean arterial pressure were detected between the adult giraffe-type *FGFR1* mice and wild-type *FGFR1* controls.  $n=5$ ,  $P>0.05$ , independent Student's t-test. Error bars indicate SD.

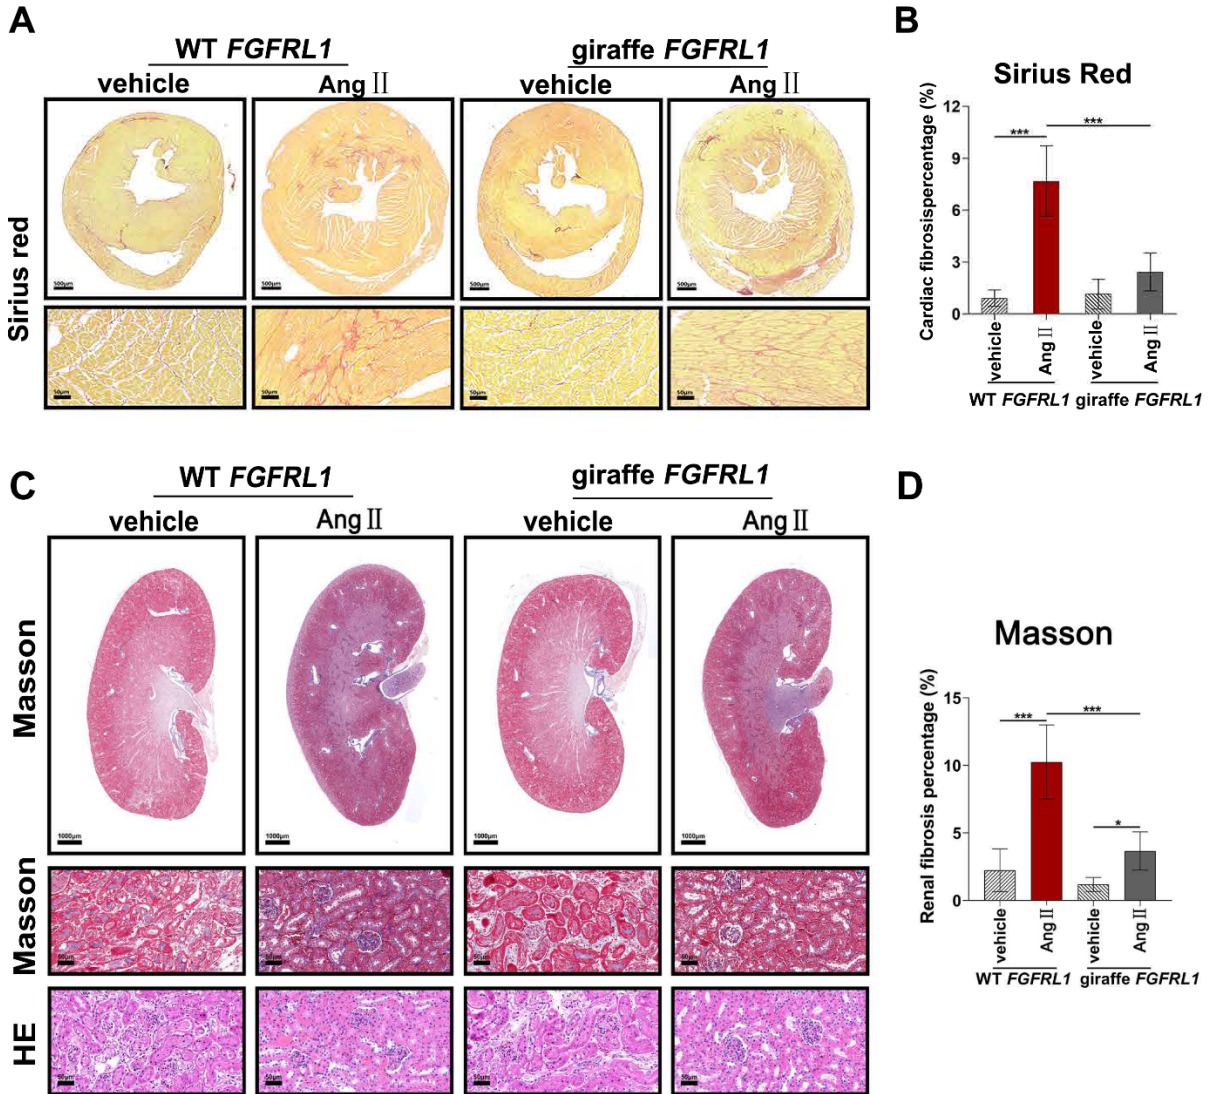

**Fig. S14| Ang II-induced hypertension results in less myocardial and renal fibrosis in giraffe-type *FGFRL1* mice.** (A) Representative histological images of Sirius Red-stained cross-sections of hearts of WT *FGFRL1* and giraffe-type *FGFRL1* mice infused for 28 days with vehicle or Ang II (900 ng/kg/min). (B) The proportion of collagen fibers (%) was significantly lower in giraffe-type *FGFRL1* mice than in the WT *FGFRL1* mice, when both were infused with Ang II for 28 days.  $n=6$ ,  $***P<0.001$ , one-way ANOVA followed by Tukey's post hoc test. Error bars indicate SD. (C) Representative histological images of Masson-stained and HE-stained cross-sections of kidney of WT *FGFRL1* and giraffe-type *FGFRL1* mice infused for 28 days with vehicle or Ang II (900 ng/kg/min). (D) The proportion of collagen fibers (%) was significantly lower in giraffe-type *FGFRL1* mice than in the WT *FGFRL1* mice, when both were infused with Ang II for 28 days.  $n=6$ ,  $***P<0.001$ , one-way ANOVA followed by Tukey's post hoc test. Error bars indicate SD.

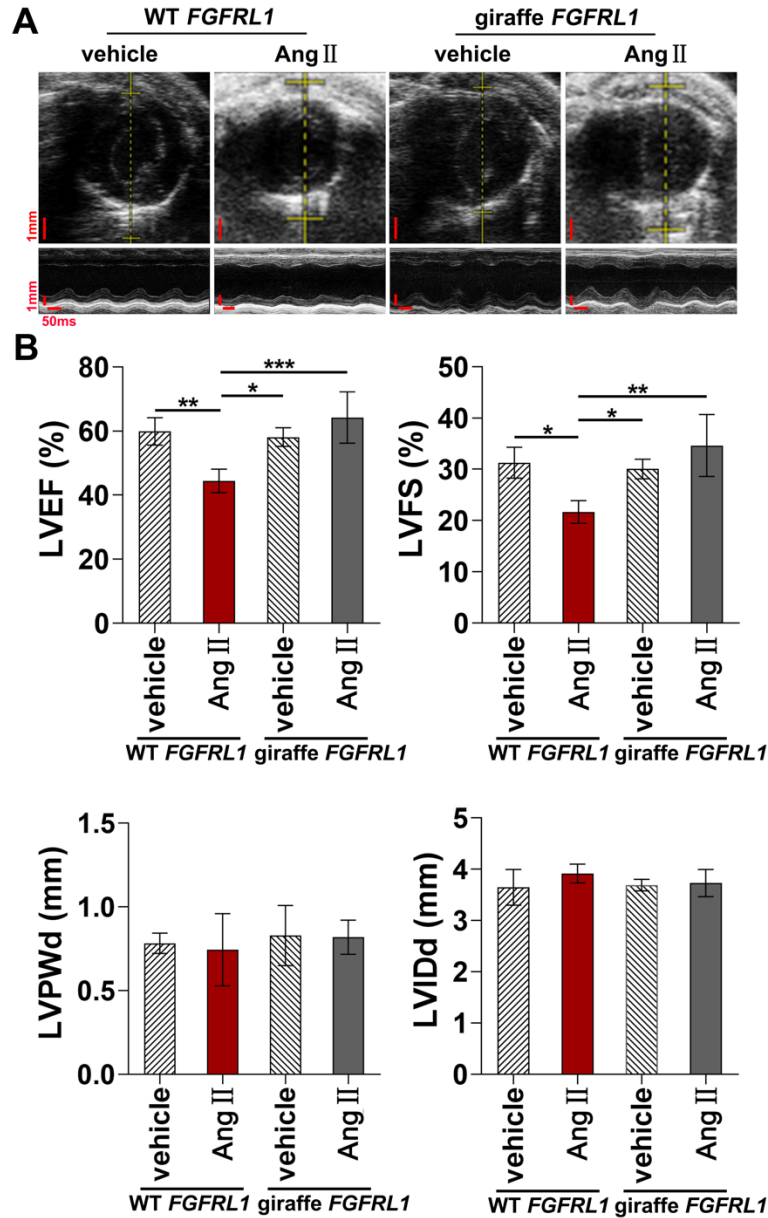

**Fig. S15| Ang II-induced hypertension weakens myocardial function in WT *FGFR1* mice. (A)** Echocardiographic images of adult WT *FGFR1* and giraffe-type *FGFR1* mice, following infusion for 28 days with vehicle or Ang II (900 ng/kg/min). **(B)** Hypertension results in significant reductions in LVEF and LVFS, but not LVPWd and LVIDd, in WT *FGFR1* mice after 28 days of Ang II infusion. The giraffe-type *FGFR1* mice showed significantly higher LVEF and LVFS than the WT *FGFR1* mice after 28 days of Ang II infusion. No significant difference was found in LVPWd or LVIDd between the giraffe-type *FGFR1* mice and WT *FGFR1* mice at the end of Ang II infusion. n=4, \* $P < 0.05$ , \*\* $P < 0.01$ , one-way ANOVA followed by Tukey's post hoc test. Error bars indicate SD.



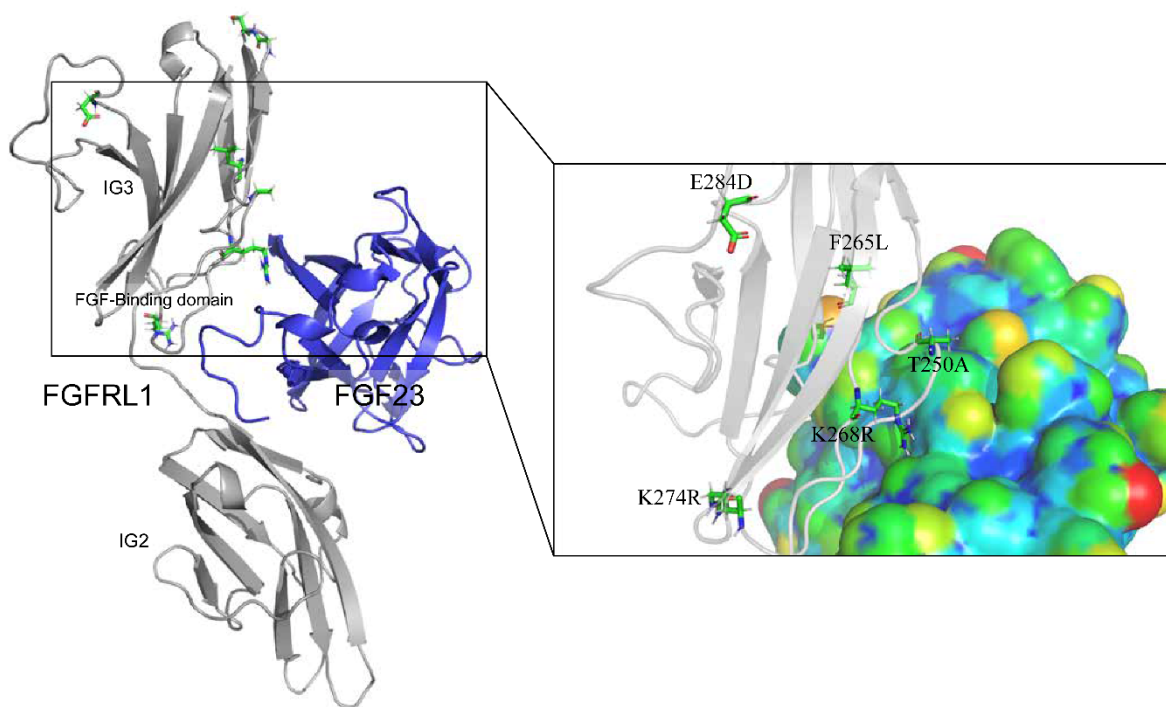

**Fig. S16|3D modeling of the interaction between FGFR1 and FGF23 proteins.** 3D modeling showed that giraffe's seven unique substitutions (**Fig. S9**) (shown in green in the image to the left) are located near the FGF-binding and IG3 domain of FGFR1. A close-up of the interaction interface is shown in the image to the right. According to the docking results, the interface score of mtFGFR1 (-21.560 REU) is lower than that of wtFGFR1 (-16.683 REU), and further MD simulation and MMGBSA calculation shows that the binding free energy of mtFGFR1 (seven sites in giraffe-type) (-123.72 kJ/mol  $\pm$ 1.24) is significantly lower than that of wtFGFR1 (seven sites changed to common type) (-112.43 kJ/mol  $\pm$ 0.79), which suggests that the mutation significantly enhance the binding affinity. Furthermore, the K268R mutation (shown to the right) is on part of the docking interface that contacts the polar surface of FGF23, and may significantly improve the interaction by enhancing polarity.

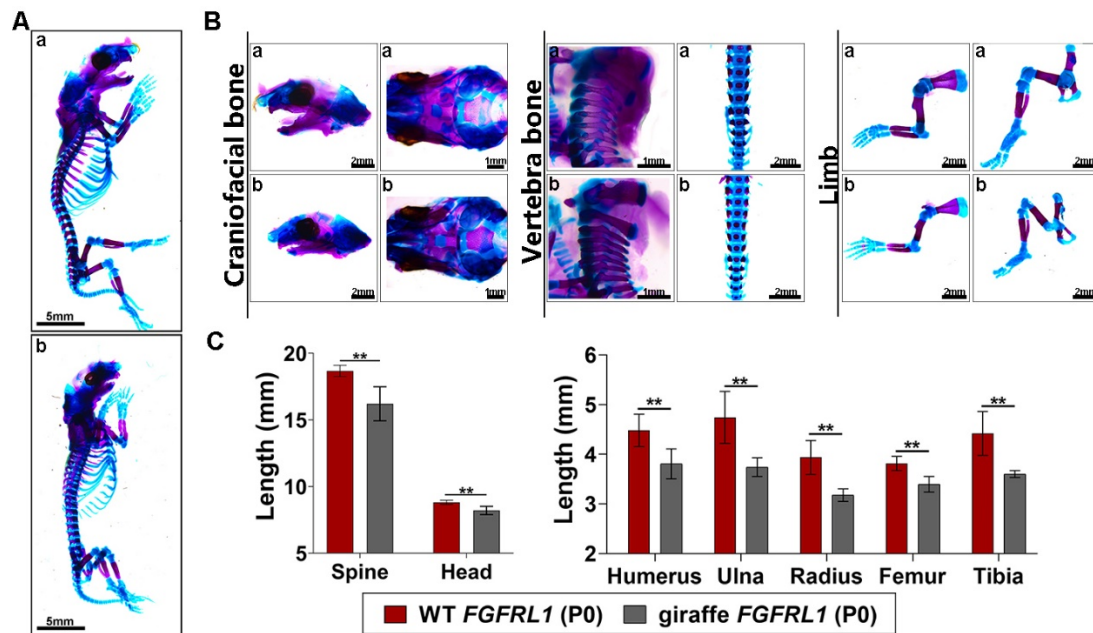

**Fig. S17** Visualization of skeletons of P0 WT *FGFR1* and giraffe-type *FGFR1* mice stained with Alizarin red and Alcian blue. (A) Lateral view of whole-mount skeletons of P0 WT *FGFR1* (a) and giraffe-type *FGFR1* mice (b). (B) Representative images of craniofacial bone, vertebra bone and limbs in P0 WT *FGFR1* (a) and giraffe-type *FGFR1* mice (b). (C) The giraffe-type *FGFR1* mice had significantly shorter heads, spines and limbs than WT *FGFR1* mice.  $n=5$ ,  $**P<0.01$ , independent Student's *t*-test. Error bars indicate SD (standard deviations).

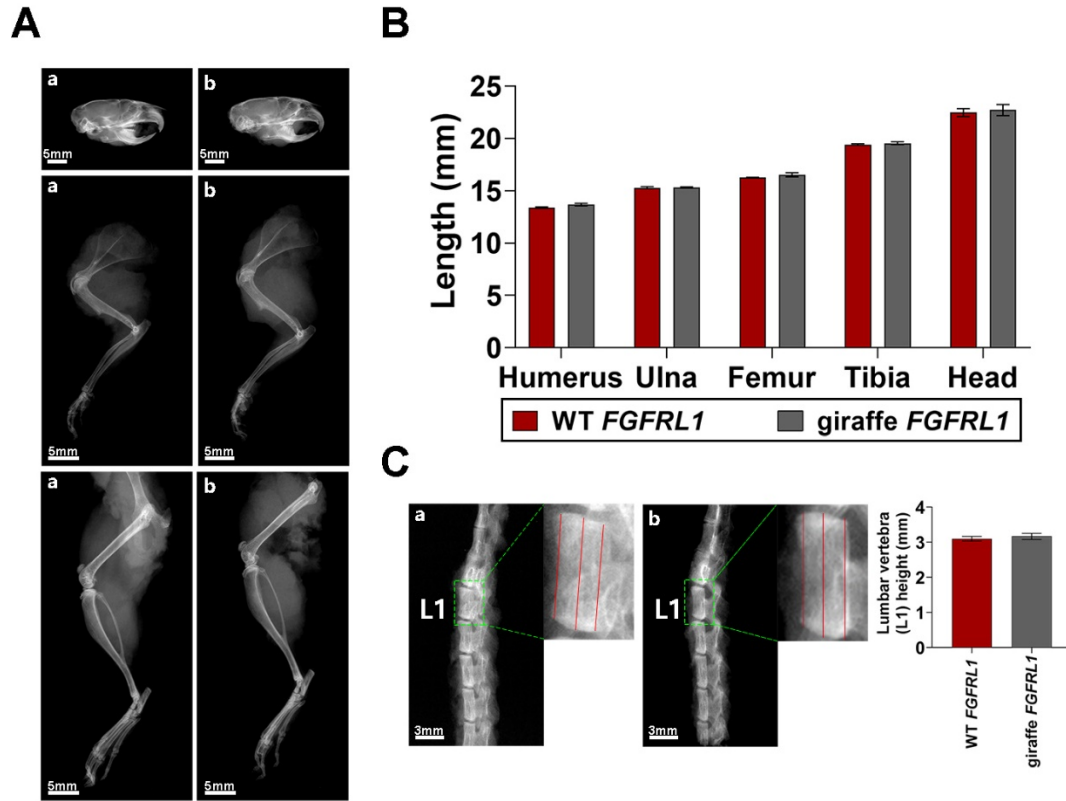

**Fig. S18| Skeletal characteristics of adult WT *FGFR1* and giraffe-type *FGFR1* mice. (A)** X-rays of skulls, forelimbs and hind limbs of adult WT *FGFR1* (a) and giraffe-type *FGFR1* mice (b). **(B)** No significant difference ( $n=3$ ,  $p>0.05$ , independent Student's t-test) in limbs and head length was detected between adult WT *FGFR1* and giraffe-type *FGFR1* mice. **(C)** X-rays of the lumbar spine of adult WT *FGFR1* (a) and giraffe-type *FGFR1* mice (b). No significant difference ( $n=4$ ,  $P>0.05$ , independent Student's t-test) in height of their L1 vertebra was found. Error bars indicate SD.

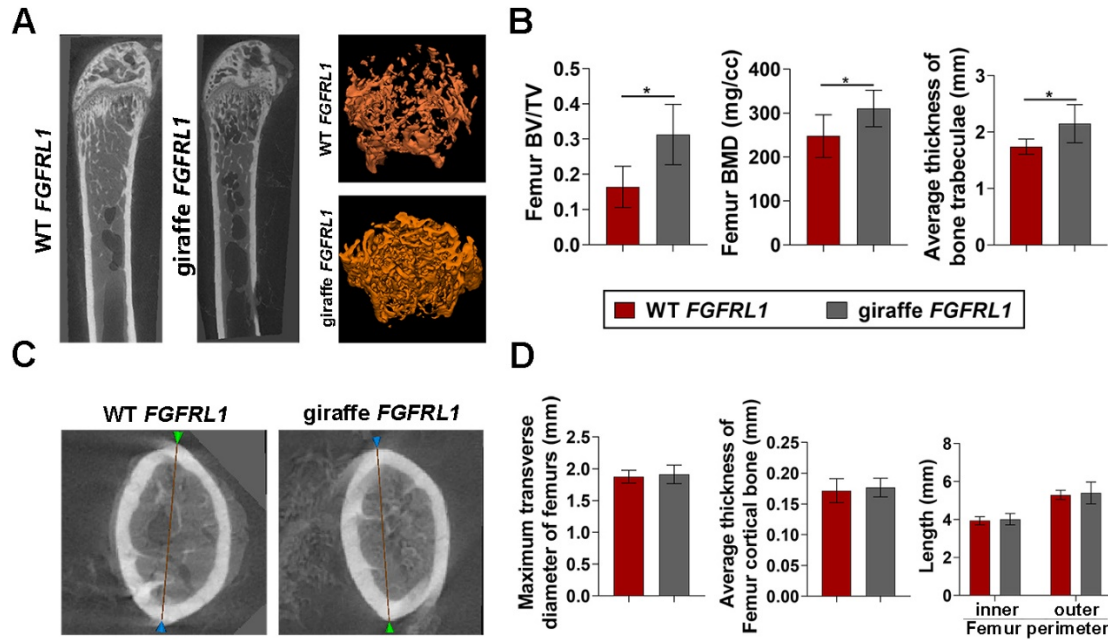

**Fig. S19| Microstructural characteristics of distal femur in adult WT *FGFR1* and giraffe-type *FGFR1* mice.** (A) Representative MicroCT images of distal femurs from the adult WT *FGFR1* and giraffe-type *FGFR1* mice. (B) The giraffe-type *FGFR1* mice had significantly higher BMD, BV/TV and average trabeculae thickness in femurs than the WT *FGFR1* mice. n=6, \* $P < 0.05$ , independent Student's *t*-test. (C) MicroCT-derived images of the cortex at mid-diaphysis of femurs of adult WT *FGFR1* and giraffe-type *FGFR1* mice. (D) No significant difference was found in the maximum transverse diameter, average thickness of cortical bone, or inner and outer perimeter of femurs between the WT *FGFR1* and giraffe-type *FGFR1* mice. n=6,  $P > 0.05$ , independent Student's *t*-test. Error bars indicate SD.

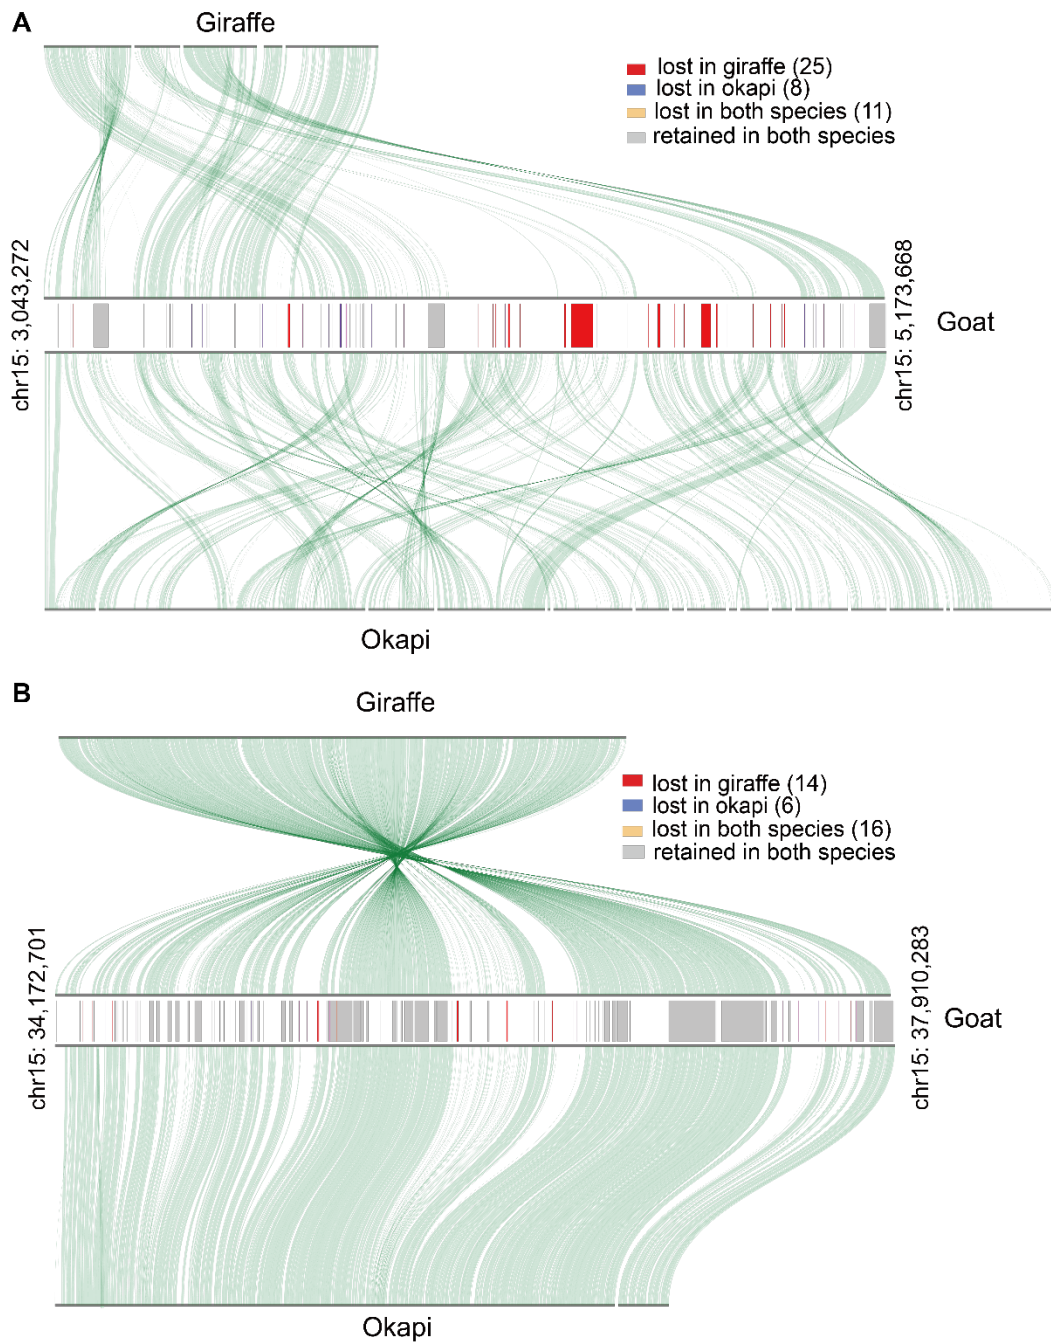

**Fig. S20| Clusters of lost olfactory receptors (ORs) in the giraffe genome.** With goat chromosome 15 as reference, the ORs uniquely lost in giraffe clustered in two regions, as shown in (A) and (B). Within each region, positions of genes are shown as bars in the middle panel, and the alignments between giraffe-goat or okapi-goat are shown in the upper and lower panel respectively. In both regions, giraffe has lost more genes than okapi.

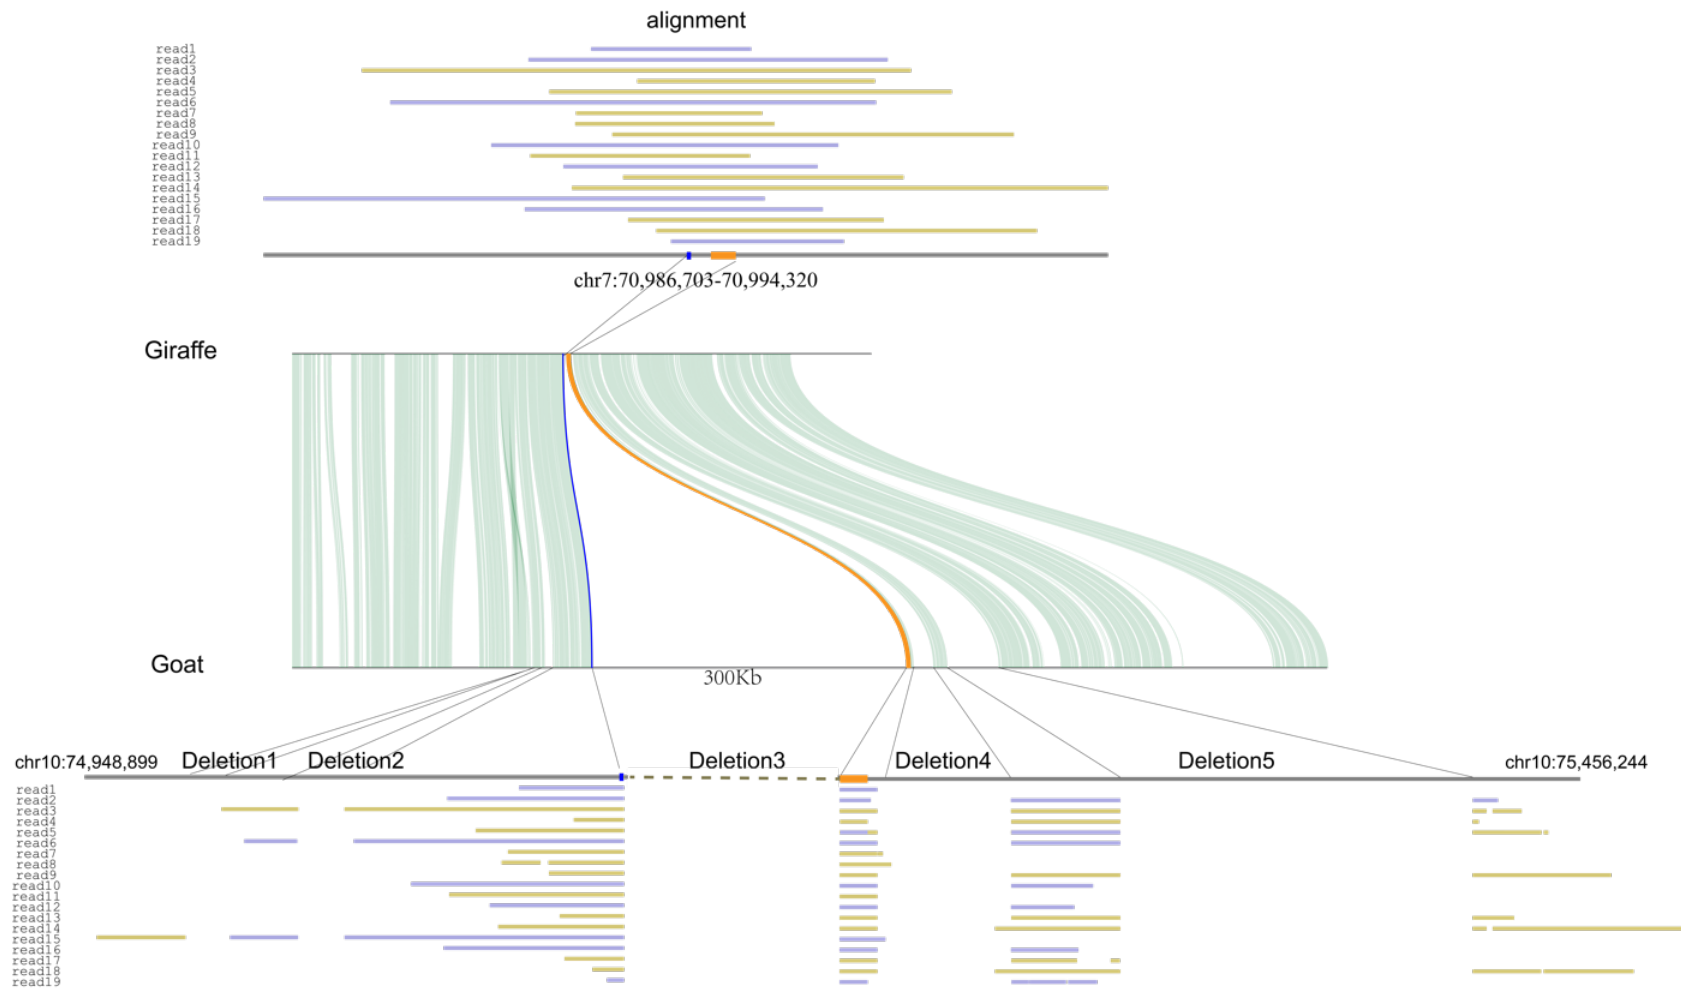

**Fig. S21| Nanopore long reads of giraffe can finely span the deletion region in giraffe genome.** With the largest deletion on giraffe’s chr7 as an example (region Deletion3 on goat), 19 giraffe’s long reads can finely span an 8kb region around the deletion (upper panel), however, these reads would be mapped to segmented regions on goat genome (ARS1) with other nearby deletion regions (Deletion1, 2, 4 and 5) cannot be mapped neither, which can help to rule out potential assembly error. The two synteny blocks nearby the largest deletion in giraffe were marked in blue or orange, and the color of reads represents mapping orientation.

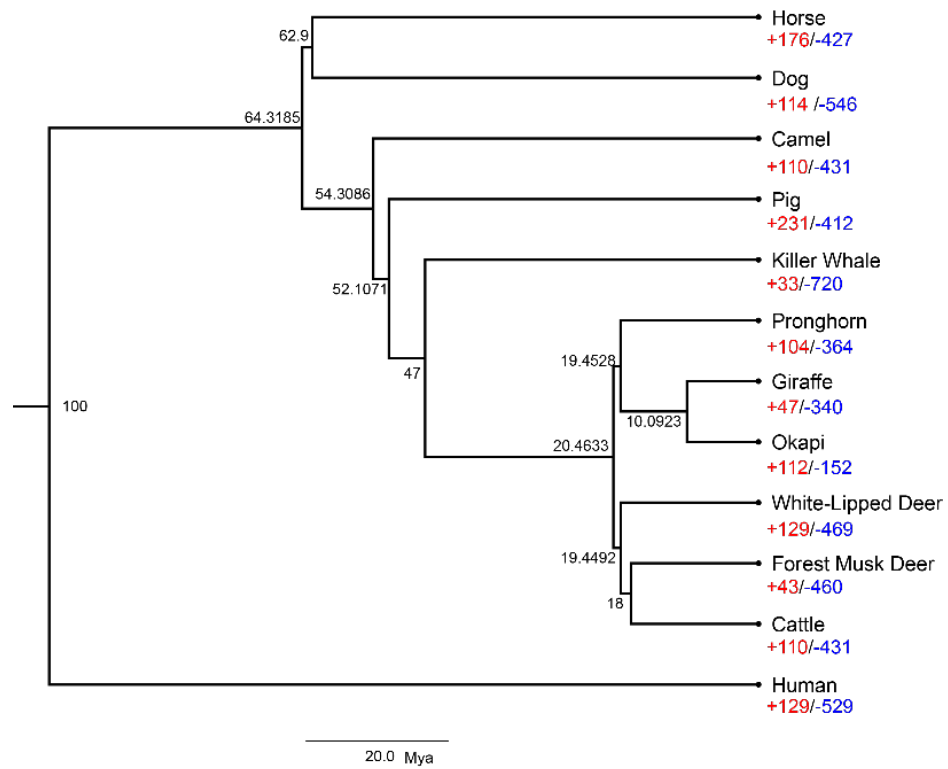

**Fig. S22| Estimation of gene family expansion and contraction in giraffe and other mammals.** Numbers of expanded and contracted gene families are shown in red and blue, respectively. The time tree used for CAFÉ analysis here was extracted from the ruminant study before (9).

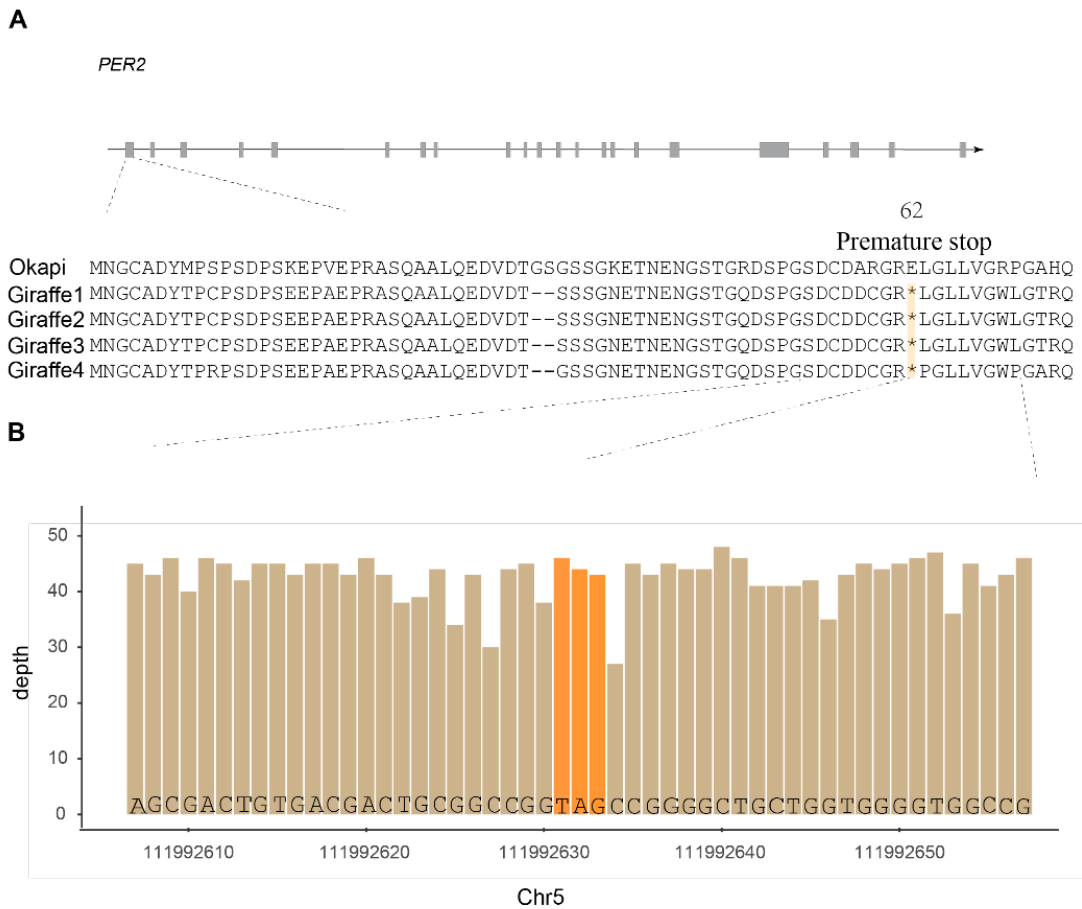

**Fig. S23| A premature stop codon located in the first exon of *PER2*.** (A) The gene structure of *PER2*, and the stop codon was verified by examination of currently available giraffe assemblies (Giraffe1: Agaba, M. et al (7); Giraffe2: Chen, L. et al (9); Giraffe3: Farre, M. et al (74); Giraffe4: this study). (B) Reads depth of the stop codon is similar as local region (genome average: 54 $\times$ ).



**Table S1| Statistics summary of filtered sequencing data for genome assembly.**

| Type             | Platform    | Total reads | Total bases (Gb) | Depth (×) | Application                               |
|------------------|-------------|-------------|------------------|-----------|-------------------------------------------|
| Third-generation | Nanopore    | 4,124,698   | 140.56           | 56        | Assembly of initial contigs               |
| Next generation  | HiSeq2000   | 650,983,031 | 199.46           | 80        | Genome survey and genomic base correction |
| HiC              | HiSeq X Ten | 693,531,404 | 138.71           | 55        | Chromosome construction                   |

The sequencing depth was calculated by the assembled genome size (Table S3)

**Table S2| Quality statistics of the assembled giraffe genome.**

| <b>Statistics</b> | <b>Contig</b>      |               | <b>Scaffold</b>    |               |
|-------------------|--------------------|---------------|--------------------|---------------|
|                   | <b>Length (bp)</b> | <b>Number</b> | <b>Length (bp)</b> | <b>Number</b> |
| N90               | 6,097,037          | 74            | 118,944,183        | 13            |
| N80               | 14,553,272         | 49            | 138,611,967        | 11            |
| N70               | 21,216,402         | 36            | 153,209,366        | 10            |
| N60               | 26,459,807         | 26            | 154,917,489        | 8             |
| N50               | 35,949,831         | 19            | 158,234,173        | 7             |
| Average length    |                    | 2,827,641     |                    | 1,164,272     |
| Max length        |                    | 3,643,417     |                    | 236,005,560   |
| Total length      |                    | 2,400,667,334 |                    | 2,441,480,433 |
| Total number      |                    | 849           |                    | 2,096         |
| Number >= 10 Kb   |                    | 695           |                    | 466           |

**Table S3| Summary statistics of assembled chromosome-level giraffe genome.**

| <b>Chromosome</b>             | <b>Length (bp)</b> |
|-------------------------------|--------------------|
| 1                             | 210,418,314        |
| 2                             | 235,793,497        |
| 3                             | 188,969,416        |
| 4                             | 210,259,023        |
| 5                             | 186,608,127        |
| 6                             | 176,660,016        |
| 7                             | 154,882,256        |
| 8                             | 153,136,160        |
| 9                             | 153,708,084        |
| 10                            | 158,058,458        |
| 11                            | 133,580,009        |
| 12                            | 137,671,694        |
| 13                            | 118,918,659        |
| 14                            | 56,087,642         |
| X                             | 114,100,299        |
| Bases anchored to chromosomes | 2,391,484,175      |
| Unanchored scaffolds          | 2,081              |
| Unanchored bases              | 49,996,258         |
| Total length of genome        | 2,441,480,433      |
| Chromosome/total              | 97.95%             |

**Table S4| Mapping ratio of Nanopore reads to giraffe genome statistics.**

| <b>Term</b>      | <b>Reads number</b> | <b>Percentage (%)</b> |
|------------------|---------------------|-----------------------|
| <b>MQ&gt;=0</b>  | 4,122,883           | 99.96                 |
| <b>MQ&gt;=5</b>  | 4,102,423           | 99.46                 |
| <b>MQ&gt;=10</b> | 4,097,461           | 99.34                 |
| <b>MQ&gt;=30</b> | 4,079,596           | 98.91                 |
| <b>MQ&gt;=60</b> | 4,048,745           | 98.16                 |
| <b>Total</b>     | 4,124,698           | --                    |

MQ: Mapping quality, generated by minimap2 (76)

**Table S5| Mapping ratio of Illumina reads to giraffe genome.**

| <b>Library Type</b> | <b>Total reads</b> | <b>Mapped reads</b> | <b>Mapped reads ratio</b> | <b>Properly paired</b> | <b>Properly paired ratio</b> |
|---------------------|--------------------|---------------------|---------------------------|------------------------|------------------------------|
| Illumina HiSeq2000  | 1,306,890,991      | 1,300,467,032       | 99.51%                    | 1,264,730,380          | 97.14%                       |

**Table S6| Quality evaluation of the assembled genome and annotated protein set using BUSCO (v2.0)(46) software with “mammalia\_odb9” dataset.**

| <b>Types of BUSCOs</b>          | <b>Genome</b> |                  | <b>Protein</b> |                  |
|---------------------------------|---------------|------------------|----------------|------------------|
|                                 | <b>Count</b>  | <b>Ratio (%)</b> | <b>Count</b>   | <b>Ratio (%)</b> |
| Complete BUSCOs                 | 3,946         | 96.15            | 3,973          | 96.81            |
| Complete and single-copy BUSCOs | 3,829         | 93.30            | 3,922          | 95.57            |
| Complete and duplicated BUSCOs  | 117           | 2.85             | 51             | 2.49             |
| Fragmented BUSCOs               | 71            | 1.73             | 66             | 1.61             |
| Missing BUSCOs                  | 87            | 2.12             | 65             | 1.58             |

**Table S7| Genome quality comparison of all available giraffe genomes.**

| <b>Genome</b>         | <b>Sequencing method</b>   | <b>Chromosome</b> | <b>Genome BUSCO</b> | <b>Genome size (contigs<math>\geq</math>500bp)</b> | <b>N ratio</b> |
|-----------------------|----------------------------|-------------------|---------------------|----------------------------------------------------|----------------|
| Giraffe1(7)           | Illumina                   | no                | 87.10%              | 2,593,494,537                                      | 3.63%          |
| Giraffe2(9)           | Illumina                   | no                | 94.90%              | 2,460,243,901                                      | 3.12%          |
| Giraffe3(74)          | Illumina + Chicago library | Yes (n=24)        | 95.00%              | 2,463,443,901                                      | 3.25%          |
| Giraffe4 (This study) | Nanopore + Illumina + HiC  | Yes (n=15)        | 96.15%              | 2,441,480,433                                      | 0.14%          |

**Table S8| Repeat elements annotation of the giraffe genome.**

| Type           | Repeat Size (bp) | Percent of genome (%) |
|----------------|------------------|-----------------------|
| Trf            | 41,261,019       | 1.69                  |
| Repeatmasker   | 889,431,322      | 36.43                 |
| Proteinmask    | 364,513,029      | 14.93                 |
| <i>De novo</i> | 781,029,591      | 31.99                 |
| Total          | 1,056,916,879    | 43.29                 |



**Table S9| Statistics of transposable elements in giraffe genome.**

| Type    | Rebase TEs  |                         | TE proteins |                         | De novo     |                         | Combined TEs  |                         |
|---------|-------------|-------------------------|-------------|-------------------------|-------------|-------------------------|---------------|-------------------------|
|         | Length (bp) | Percentage of genome(%) | Length (bp) | Percentage of genome(%) | Length (bp) | Percentage of genome(%) | Length (bp)   | Percentage of genome(%) |
| DNA     | 46,876,424  | 1.92                    | 6,591,997   | 0.27                    | 34,180,726  | 1.40                    | 57,130,642    | 2.34                    |
| LINE    | 563,981,980 | 23.10                   | 349,131,702 | 14.30                   | 567,644,201 | 23.25                   | 739,768,571   | 30.30                   |
| SINE    | 175,786,591 | 7.20                    | 0           | 0                       | 23,926,508  | 0.98                    | 177,739,776   | 7.28                    |
| LTR     | 112,308,100 | 4.60                    | 9,033,478   | 0.37                    | 69,826,340  | 2.86                    | 119,632,541   | 4.90                    |
| Other   | 0           | 0                       | 0           | 0                       | 0           | 0                       | 0             | 0                       |
| Unknown | 488,296     | 0.02                    | 0           | 0                       | 105,960,251 | 4.34                    | 106,204,399   | 4.35                    |
| Total   | 889,431,322 | 36.43                   | 364,513,029 | 14.93                   | 777,611,518 | 31.85                   | 1,033,478,667 | 42.33                   |

**Table S10| Statistics of annotated genes from the *de novo*, homolog and final gene sets.**

| Methods |          | Total number | Average gene length (bp) | Average CDS length (bp) | Average exon number | Average exon length (bp) | Average intron length (bp) |
|---------|----------|--------------|--------------------------|-------------------------|---------------------|--------------------------|----------------------------|
| De novo | Augustus | 19,892       | 46,470.64                | 1,482.66                | 8.95                | 165.68                   | 5,659.49                   |
|         | Genscan  | 40,114       | 39,802.84                | 1,275.12                | 7.85                | 162.36                   | 5,621.33                   |
|         | Human    | 14,863       | 32,361.11                | 1,739.66                | 10.1                | 172.22                   | 3,364.58                   |
| Homolog | Cattle   | 15,099       | 29,711.27                | 1,685.51                | 9.96                | 169.22                   | 3,127.76                   |
|         | Sheep    | 15,244       | 30,359.82                | 1,659.88                | 10.01               | 165.79                   | 3,184.61                   |
| EVM     | Giraffe  | 21,580       | 46,349.67                | 1,591.83                | 9.65                | 164.91                   | 5,172.65                   |

**Table S11| Functional annotation of giraffe genes.**

| <b>Database</b> | <b>Number</b> | <b>Percentage (%)</b> |
|-----------------|---------------|-----------------------|
| InterPro        | 16,875        | 78.19                 |
| GO              | 12,906        | 59.80                 |
| KEGG            | 14561         | 67.47                 |
| Swissprot       | 18,186        | 84.27                 |
| COG             | 6,909         | 32.02                 |
| TrEMBL          | 18,463        | 85.56                 |
| NR              | 16,767        | 77.70                 |
| Unannotated     | 2,959         | 13.71                 |
| Annotated       | 18,621        | 86.29                 |
| <b>Total</b>    |               | 21,580                |

**Table S12| Lengths of reconstructed ancestral chromosome (chr) karyotypes of Giraffidae and Bovidae.**

| <b>Ancestral chr ID</b> | <b>Length (bp)</b> | <b>Ancestral chr ID</b> | <b>Length (bp)</b> |
|-------------------------|--------------------|-------------------------|--------------------|
| 1                       | 145,495,223        | 16                      | 66,435,077         |
| 2                       | 128,455,352        | 17                      | 66,132,375         |
| 3                       | 112,730,851        | 18                      | 65,762,662         |
| 4                       | 108,139,951        | 19                      | 64,478,890         |
| 5                       | 107,405,570        | 20                      | 59,548,638         |
| 6                       | 107,307,673        | 21                      | 58,379,626         |
| 7                       | 99,033,524         | 22                      | 57,917,096         |
| 8                       | 93,818,976         | 23                      | 54,207,695         |
| 9                       | 91,582,586         | 24                      | 49,215,121         |
| 10                      | 89,219,325         | 25                      | 47,378,180         |
| 11                      | 87,492,783         | 26                      | 46,476,476         |
| 12                      | 84,212,973         | 27                      | 43,894,601         |
| 13                      | 80,597,291         | 28                      | 41,155,042         |
| 14                      | 75,694,660         | 29                      | 20,592,860         |
| 15                      | 74,210,038         | 30                      | 18,933,069         |

**Table S13| 101 PSGs identified in giraffe genome.** The “Gene ID” column represents the gene ids of cattle (*Bos taurus*). In the “Gene symbol” column, \* marked genes have been reported as PSGs in previous study, and # marked genes are those overlap with other highly divergent genes reported in previous study (7).

| Gene ID            | Gene symbol | Description                                                | p-value  | q-value  |
|--------------------|-------------|------------------------------------------------------------|----------|----------|
| ENSBTAG00000014760 | FOXE1       | forkhead box E1                                            | 1.79E-06 | 5.63E-03 |
| ENSBTAG00000013346 | SIX5        | SIX homeobox 5                                             | 2.13E-06 | 5.63E-03 |
| ENSBTAG00000027464 | FGFRL1*     | fibroblast growth factor receptor-like 1                   | 2.58E-06 | 5.68E-03 |
| ENSBTAG00000012945 | PDE6A       | phosphodiesterase 6A                                       | 9.97E-05 | 1.14E-01 |
| ENSBTAG00000000581 | DOCK10      | dedicator of cytokinesis 10                                | 1.03E-04 | 1.14E-01 |
| ENSBTAG00000012659 | LRIF1       | ligand dependent nuclear receptor interacting factor 1     | 2.31E-04 | 2.26E-01 |
| ENSBTAG00000017425 | GJB2        | gap junction protein beta 2                                | 3.75E-04 | 3.09E-01 |
| ENSBTAG00000020856 | HFM1        | HFM1, ATP dependent DNA helicase homolog                   | 6.57E-04 | 3.95E-01 |
| ENSBTAG00000004322 | FOS         | Fos proto-oncogene, AP-1 transcription factor subunit      | 6.62E-04 | 3.95E-01 |
| ENSBTAG00000025182 | FBXL21      | F-box and leucine rich repeat protein 21                   | 8.35E-04 | 4.59E-01 |
| ENSBTAG00000019139 | PHF3        | PHD finger protein 3                                       | 9.74E-04 | 4.94E-01 |
| ENSBTAG00000010204 | PCMT1       | protein-L-isoaspartate (D-aspartate) O-methyltransferase   | 1.43E-03 | 6.51E-01 |
| ENSBTAG00000004147 | FBXO18      | F-box protein, helicase, 18                                | 1.62E-03 | 6.73E-01 |
| ENSBTAG00000004722 | THUMPD2     | THUMP domain containing 2                                  | 1.67E-03 | 6.73E-01 |
| ENSBTAG00000009085 | SLC35A5     | solute carrier family 35 member A5                         | 1.68E-03 | 6.73E-01 |
| ENSBTAG00000019565 | NCOA4       | nuclear receptor coactivator 4                             | 2.11E-03 | 8.19E-01 |
| ENSBTAG00000026307 | ZNF629      | zinc finger protein 629                                    | 2.40E-03 | 8.92E-01 |
| ENSBTAG00000030864 | FAM228B     | family with sequence similarity 228 member B               | 2.43E-03 | 8.92E-01 |
| ENSBTAG00000017852 | ALDH9A1     | aldehyde dehydrogenase 9 family member A1                  | 2.65E-03 | 9.40E-01 |
| ENSBTAG00000013955 | TRAPPC9     | trafficking protein particle complex 9                     | 3.13E-03 | 1.00E+00 |
| ENSBTAG00000005989 | LAP3        | leucine aminopeptidase 3                                   | 3.24E-03 | 1.00E+00 |
| ENSBTAG00000011446 | SEMA7A*     | semaphorin 7A (John Milton Hagen blood group)              | 3.34E-03 | 1.00E+00 |
| ENSBTAG00000020281 | NIN         | ninein                                                     | 3.52E-03 | 1.00E+00 |
| ENSBTAG00000033835 | MPZ         | myelin protein zero                                        | 3.91E-03 | 1.00E+00 |
| ENSBTAG00000039582 | NDUFC1      | NADH:ubiquinone oxidoreductase subunit C1                  | 4.18E-03 | 1.00E+00 |
| ENSBTAG00000038600 | LRRC15      | leucine rich repeat containing 15                          | 4.19E-03 | 1.00E+00 |
| ENSBTAG00000038138 | ACE3        | angiotensin I converting enzyme (peptidyl-dipeptidase A) 3 | 4.48E-03 | 1.00E+00 |
| ENSBTAG00000006404 | CENPT       | centromere protein T                                       | 4.78E-03 | 1.00E+00 |
| ENSBTAG00000019843 | HAUS6*      | HAUS augmin like complex subunit 6                         | 4.92E-03 | 1.00E+00 |

|                     |           |                                                                              |          |          |
|---------------------|-----------|------------------------------------------------------------------------------|----------|----------|
| ENSBTAG00000009208  | TCTN1     | tectonic family member 1                                                     | 5.07E-03 | 1.00E+00 |
| ENSBTAG000000031765 | CCDC189   | coiled-coil domain containing 189                                            | 5.13E-03 | 1.00E+00 |
| ENSBTAG000000013931 | FAM96B    | family with sequence similarity 96 member B                                  | 5.38E-03 | 1.00E+00 |
| ENSBTAG000000020412 | RAP2A     | RAP2A, member of RAS oncogene family                                         | 5.42E-03 | 1.00E+00 |
| ENSBTAG000000021971 | SNCAIP    | synuclein alpha interacting protein                                          | 5.58E-03 | 1.00E+00 |
| ENSBTAG000000010775 | POGK      | pogo transposable element with KRAB domain                                   | 5.76E-03 | 1.00E+00 |
| ENSBTAG000000038520 | TMPRSS11E | NA                                                                           | 5.91E-03 | 1.00E+00 |
| ENSBTAG000000011213 | NTRK3     | NA                                                                           | 6.95E-03 | 1.00E+00 |
| ENSBTAG000000009254 | CCDC129   | coiled-coil domain containing 129                                            | 6.97E-03 | 1.00E+00 |
| ENSBTAG000000011179 | PDCD2     | programmed cell death 2                                                      | 7.12E-03 | 1.00E+00 |
| ENSBTAG000000047087 | MCIDAS    | multiciliate differentiation and DNA synthesis associated cell cycle protein | 8.05E-03 | 1.00E+00 |
| ENSBTAG000000000542 | CFAP36    | cilia and flagella associated protein 36                                     | 8.48E-03 | 1.00E+00 |
| ENSBTAG000000010719 | ANGPTL1   | angiopoietin like 1                                                          | 8.52E-03 | 1.00E+00 |
| ENSBTAG000000011876 | MORC3     | MORC family CW-type zinc finger 3                                            | 9.85E-03 | 1.00E+00 |
| ENSBTAG000000031632 | ADRA1A*   | adrenoceptor alpha 1A                                                        | 9.93E-03 | 1.00E+00 |
| ENSBTAG000000001844 | MOGS      | mannosyl-oligosaccharide glucosidase                                         | 1.01E-02 | 1.00E+00 |
| ENSBTAG000000014166 | POLR1B    | RNA polymerase I subunit B                                                   | 1.02E-02 | 1.00E+00 |
| ENSBTAG000000017517 | ZNF236    | zinc finger protein 236                                                      | 1.02E-02 | 1.00E+00 |
| ENSBTAG000000005477 | LAPTM5    | lysosomal protein transmembrane 5                                            | 1.03E-02 | 1.00E+00 |
| ENSBTAG000000004782 | PTPRCAP   | protein tyrosine phosphatase, receptor type C associated protein             | 1.05E-02 | 1.00E+00 |
| ENSBTAG000000006392 | TTC7B     | tetratricopeptide repeat domain 7B                                           | 1.22E-02 | 1.00E+00 |
| ENSBTAG000000013380 | CEP192    | centrosomal protein 192                                                      | 1.22E-02 | 1.00E+00 |
| ENSBTAG000000016713 | TMEM30B   | transmembrane protein 30B                                                    | 1.28E-02 | 1.00E+00 |
| ENSBTAG000000019876 | DSC1      | desmocollin 1                                                                | 1.34E-02 | 1.00E+00 |
| ENSBTAG000000000326 | ENTHD1    | ENTH domain containing 1                                                     | 1.35E-02 | 1.00E+00 |
| ENSBTAG000000012519 | XDH       | xanthine dehydrogenase                                                       | 1.41E-02 | 1.00E+00 |
| ENSBTAG000000005016 | AP3B1     | adaptor related protein complex 3 beta 1 subunit                             | 1.47E-02 | 1.00E+00 |
| ENSBTAG000000003810 | LOC524650 | uncharacterized LOC524650                                                    | 1.53E-02 | 1.00E+00 |
| ENSBTAG000000000201 | LTN1      | listerin E3 ubiquitin protein ligase 1                                       | 1.55E-02 | 1.00E+00 |
| ENSBTAG000000013283 | PRR19*    | proline rich 19                                                              | 1.56E-02 | 1.00E+00 |
| ENSBTAG000000011325 | KHK       | ketoheokinase                                                                | 1.62E-02 | 1.00E+00 |
| ENSBTAG000000007723 | KDSR      | 3-ketodihydroshingosine reductase                                            | 1.62E-02 | 1.00E+00 |
| ENSBTAG000000015321 | TRERF1    | transcriptional regulating factor 1                                          | 1.67E-02 | 1.00E+00 |
| ENSBTAG000000014158 | CCNT2     | cyclin T2                                                                    | 1.67E-02 | 1.00E+00 |

|                    |              |                                                            |          |          |
|--------------------|--------------|------------------------------------------------------------|----------|----------|
| ENSBTAG00000018033 | PIP4K2A      | phosphatidylinositol-5-phosphate 4-kinase type 2 alpha     | 1.68E-02 | 1.00E+00 |
| ENSBTAG00000012678 | COLGALT1     | collagen beta(1-O)galactosyltransferase 1                  | 1.71E-02 | 1.00E+00 |
| ENSBTAG00000010679 | LRRC31       | leucine rich repeat containing 31                          | 1.78E-02 | 1.00E+00 |
| ENSBTAG00000000888 | SPTA1        | spectrin alpha, erythrocytic 1                             | 1.89E-02 | 1.00E+00 |
| ENSBTAG00000026995 | PNN          | pinin, desmosome associated protein                        | 1.91E-02 | 1.00E+00 |
| ENSBTAG00000008322 | KCNA10       | potassium voltage-gated channel subfamily A member 10      | 1.94E-02 | 1.00E+00 |
| ENSBTAG00000000219 | GRIN2B       | glutamate ionotropic receptor NMDA type subunit 2B         | 1.95E-02 | 1.00E+00 |
| ENSBTAG00000014224 | IGSF9B       | immunoglobulin superfamily member 9B                       | 1.97E-02 | 1.00E+00 |
| ENSBTAG00000026986 | TTN          | titin                                                      | 2.14E-02 | 1.00E+00 |
| ENSBTAG00000005663 | HAUS2#       | HAUS augmin like complex subunit 2                         | 2.21E-02 | 1.00E+00 |
| ENSBTAG00000001138 | UFSP1        | UFM1 specific peptidase 1 (inactive)                       | 2.25E-02 | 1.00E+00 |
| ENSBTAG00000004364 | THNSL2       | threonine synthase like 2                                  | 2.30E-02 | 1.00E+00 |
| ENSBTAG00000004494 | B4GALNT1     | beta-1,4-N-acetyl-galactosaminyltransferase 1              | 2.37E-02 | 1.00E+00 |
| ENSBTAG00000020423 | EP400        | E1A binding protein p400                                   | 2.39E-02 | 1.00E+00 |
| ENSBTAG00000012241 | POLD2        | DNA polymerase delta 2, accessory subunit                  | 2.41E-02 | 1.00E+00 |
| ENSBTAG00000037397 | PRSS36       | protease, serine 36                                        | 2.50E-02 | 1.00E+00 |
| ENSBTAG00000048192 | LOC100299320 | putative olfactory receptor 10D4                           | 2.50E-02 | 1.00E+00 |
| ENSBTAG00000016717 | CEP68        | centrosomal protein 68                                     | 2.67E-02 | 1.00E+00 |
| ENSBTAG00000015449 | PPEF2        | NA                                                         | 2.75E-02 | 1.00E+00 |
| ENSBTAG00000010283 | MRPL37       | NA                                                         | 2.86E-02 | 1.00E+00 |
| ENSBTAG00000010241 | UNC5D        | unc-5 netrin receptor D                                    | 3.14E-02 | 1.00E+00 |
| ENSBTAG00000038606 | DRD5         | dopamine receptor D5                                       | 3.15E-02 | 1.00E+00 |
| ENSBTAG00000015350 | PLIN1        | perilipin 1                                                | 3.25E-02 | 1.00E+00 |
| ENSBTAG00000010306 | RXFP1        | relaxin/insulin like family peptide receptor 1             | 3.47E-02 | 1.00E+00 |
| ENSBTAG00000007190 | THAP6        | THAP domain containing 6                                   | 3.52E-02 | 1.00E+00 |
| ENSBTAG00000010118 | HAT1         | histone acetyltransferase 1                                | 3.81E-02 | 1.00E+00 |
| ENSBTAG00000004347 | ADGRF5       | adhesion G protein-coupled receptor F5                     | 3.95E-02 | 1.00E+00 |
| ENSBTAG00000039823 | KBTBD7       | kelch repeat and BTB domain-containing protein 7           | 4.03E-02 | 1.00E+00 |
| ENSBTAG00000003061 | LAMA5        | laminin subunit alpha 5                                    | 4.05E-02 | 1.00E+00 |
| ENSBTAG00000006013 | NT5DC3       | 5'-nucleotidase domain containing 3                        | 4.10E-02 | 1.00E+00 |
| ENSBTAG00000002201 | NFXL1*       | nuclear transcription factor, X-box binding like 1         | 4.37E-02 | 1.00E+00 |
| ENSBTAG00000044061 | FAXC         | failed axon connections homolog                            | 4.60E-02 | 1.00E+00 |
| ENSBTAG00000043961 | MPDZ         | multiple PDZ domain crumbs cell polarity complex component | 4.60E-02 | 1.00E+00 |
| ENSBTAG00000020457 | TGFB1*       | transforming growth factor beta 1                          | 4.65E-02 | 1.00E+00 |

|                    |          |                           |          |          |
|--------------------|----------|---------------------------|----------|----------|
| ENSBTAG00000039662 | RSC1A1   | protein DDI1 homolog 2    | 4.65E-02 | 1.00E+00 |
| ENSBTAG00000002826 | CLSPN    | claspin                   | 4.71E-02 | 1.00E+00 |
| ENSBTAG00000006659 | TMEM116  | transmembrane protein 116 | 4.78E-02 | 1.00E+00 |
| ENSBTAG00000034192 | KIAA2012 | KIAA2012 ortholog         | 4.83E-02 | 1.00E+00 |

---



**Table S14| 359 REGs identified in giraffe genome.** The “Gene ID” column represents the gene ids of cattle (*Bos taurus*). In the “Gene symbol” column, \* marked genes have been reported as PSGs in previous study, and # marked genes are those overlap with other highly divergent genes reported in previous study (7).

| Gene ID            | Gene symbol | Description                                                              | p-value  | q-value  |
|--------------------|-------------|--------------------------------------------------------------------------|----------|----------|
| ENSBTAG00000021497 | CDH23       | cadherin related 23                                                      | 1.50E-07 | 9.98E-05 |
| ENSBTAG00000008117 | SLC5A4      | solute carrier family 5 member 4                                         | 6.99E-07 | 4.19E-04 |
| ENSBTAG00000003889 | PER1        | period circadian clock 1                                                 | 8.74E-06 | 3.49E-03 |
| ENSBTAG00000031209 | SLC22A4     | solute carrier family 22 member 4                                        | 1.14E-05 | 4.42E-03 |
| ENSBTAG00000009510 | ADRA2B#     | adrenoceptor alpha 2B                                                    | 1.76E-05 | 6.60E-03 |
| ENSBTAG00000013153 | NF2#        | neurofibromin 2                                                          | 1.99E-05 | 7.20E-03 |
| ENSBTAG00000004746 | HELZ        | NA                                                                       | 2.53E-05 | 8.66E-03 |
| ENSBTAG00000045905 | PCDH15      | protocadherin related 15                                                 | 2.77E-05 | 9.21E-03 |
| ENSBTAG00000015438 | RRBP1       | NA                                                                       | 3.40E-05 | 1.07E-02 |
| ENSBTAG00000011171 | PIEZO2      | piezo type mechanosensitive ion channel component 2                      | 6.72E-05 | 1.83E-02 |
| ENSBTAG00000003410 | EFL1        | elongation factor like GTPase 1                                          | 8.96E-05 | 2.28E-02 |
| ENSBTAG00000039485 | MEIOC       | meiosis specific with coiled-coil domain                                 | 1.04E-04 | 2.48E-02 |
| ENSBTAG00000033677 | WDR90       | WD repeat domain 90                                                      | 1.47E-04 | 3.27E-02 |
| ENSBTAG00000018318 | DNAJB5      | DnaJ heat shock protein family (Hsp40) member B5                         | 1.55E-04 | 3.36E-02 |
| ENSBTAG00000007662 | HSPA5       | NA                                                                       | 1.60E-04 | 3.36E-02 |
| ENSBTAG00000025337 | MYH13       | myosin-13                                                                | 1.60E-04 | 3.36E-02 |
| ENSBTAG00000020957 | FZD5        | frizzled class receptor 5                                                | 1.82E-04 | 3.69E-02 |
| ENSBTAG00000025642 | RYR3        | ryanodine receptor 3                                                     | 2.63E-04 | 5.16E-02 |
| ENSBTAG00000017529 | CA8         | carbonic anhydrase 8                                                     | 2.86E-04 | 5.52E-02 |
| ENSBTAG00000007916 | FOXJ1       | forkhead box J1                                                          | 2.93E-04 | 5.56E-02 |
| ENSBTAG00000012225 | KPNA2       | karyopherin subunit alpha 2                                              | 3.08E-04 | 5.77E-02 |
| ENSBTAG00000008943 | ZSCAN12     | zinc finger and SCAN domain containing 12                                | 3.83E-04 | 6.86E-02 |
| ENSBTAG00000020209 | TIGD7       | NA                                                                       | 4.25E-04 | 7.44E-02 |
| ENSBTAG00000002414 | KCNJ10      | potassium voltage-gated channel subfamily J member 10                    | 4.29E-04 | 7.44E-02 |
| ENSBTAG00000000745 | AQP1        | aquaporin 1 (Colton blood group)                                         | 4.41E-04 | 7.54E-02 |
| ENSBTAG00000022169 | PREX2       | phosphatidylinositol-3,4,5-trisphosphate dependent Rac exchange factor 2 | 4.58E-04 | 7.73E-02 |
| ENSBTAG00000001030 | MTMR3       | myotubularin related protein 3                                           | 4.75E-04 | 7.90E-02 |
| ENSBTAG00000002253 | FKBP6       | FK506 binding protein 6                                                  | 5.12E-04 | 8.40E-02 |

|                     |          |                                                   |          |          |
|---------------------|----------|---------------------------------------------------|----------|----------|
| ENSBTAG00000027337  | CTSA     | cathepsin A                                       | 5.27E-04 | 8.52E-02 |
| ENSBTAG00000022915  | OR4Q2    | olfactory receptor 4Q2                            | 6.21E-04 | 9.73E-02 |
| ENSBTAG00000003710  | XPO4     | exportin 4                                        | 6.32E-04 | 9.73E-02 |
| ENSBTAG00000007817  | BRCC3    | BRCA1/BRCA2-containing complex subunit 3          | 8.37E-04 | 1.19E-01 |
| ENSBTAG00000003191  | FSCN1#   | fascin actin-bundling protein 1                   | 8.42E-04 | 1.19E-01 |
| ENSBTAG00000020540  | TMEM198  | transmembrane protein 198                         | 1.00E-03 | 1.38E-01 |
| ENSBTAG00000006417  | EDC4     | enhancer of mRNA decapping 4                      | 1.04E-03 | 1.42E-01 |
| ENSBTAG00000002398  | ZNF567   | zinc finger protein 567                           | 1.14E-03 | 1.43E-01 |
| ENSBTAG00000017747  | PLSCR3   | phospholipid scramblase 3                         | 1.15E-03 | 1.43E-01 |
| ENSBTAG00000010478  | AIP      | aryl hydrocarbon receptor interacting protein     | 1.15E-03 | 1.43E-01 |
| ENSBTAG00000007128  | ATP13A1  | ATPase 13A1                                       | 1.24E-03 | 1.53E-01 |
| ENSBTAG000000046573 | PGBD1    | NA                                                | 1.25E-03 | 1.53E-01 |
| ENSBTAG000000021195 | A1CF     | APOBEC1 complementation factor                    | 1.32E-03 | 1.58E-01 |
| ENSBTAG00000008025  | UBE3C    | ubiquitin protein ligase E3C                      | 1.35E-03 | 1.59E-01 |
| ENSBTAG000000024199 | KMT2C    | lysine methyltransferase 2C                       | 1.37E-03 | 1.59E-01 |
| ENSBTAG000000032591 | CTHRC1   | collagen triple helix repeat-containing protein 1 | 1.41E-03 | 1.59E-01 |
| ENSBTAG000000045625 | NTN3     | netrin 3                                          | 1.43E-03 | 1.59E-01 |
| ENSBTAG00000019883  | IST1     | IST1, ESCRT-III associated factor                 | 1.46E-03 | 1.59E-01 |
| ENSBTAG00000008057  | PARVG    | parvin gamma                                      | 1.50E-03 | 1.62E-01 |
| ENSBTAG00000009166  | GSX1     | GS homeobox 1                                     | 1.69E-03 | 1.77E-01 |
| ENSBTAG00000000595  | FBN3     | fibrillin 3                                       | 1.78E-03 | 1.86E-01 |
| ENSBTAG000000044100 | HEATR1   | HEAT repeat containing 1                          | 1.81E-03 | 1.87E-01 |
| ENSBTAG000000020402 | TDRD9    | tudor domain containing 9                         | 1.84E-03 | 1.88E-01 |
| ENSBTAG00000019814  | PGBD2    | piggyBac transposable element derived 2           | 1.97E-03 | 1.95E-01 |
| ENSBTAG00000001189  | AP1B1    | adaptor related protein complex 1 beta 1 subunit  | 2.09E-03 | 2.01E-01 |
| ENSBTAG00000009267  | UHRF1BP1 | UHRF1 binding protein 1                           | 2.09E-03 | 2.01E-01 |
| ENSBTAG000000026523 | PLAGL1   | PLAG1 like zinc finger 1                          | 2.28E-03 | 2.11E-01 |
| ENSBTAG00000004604  | CCDC124  | coiled-coil domain containing 124                 | 2.29E-03 | 2.11E-01 |
| ENSBTAG00000016396  | PDE11A   | phosphodiesterase 11A                             | 2.32E-03 | 2.12E-01 |
| ENSBTAG00000017136  | SSTR2#   | somatostatin receptor 2                           | 2.45E-03 | 2.19E-01 |
| ENSBTAG00000003819  | STK36    | serine/threonine kinase 36                        | 2.57E-03 | 2.25E-01 |
| ENSBTAG00000004987  | NUP210L  | nucleoporin 210 like                              | 2.61E-03 | 2.27E-01 |
| ENSBTAG00000019946  | USP44    | ubiquitin specific peptidase 44                   | 2.68E-03 | 2.31E-01 |
| ENSBTAG00000009123  | ING5     | inhibitor of growth family member 5               | 2.91E-03 | 2.42E-01 |

|                     |           |                                                                       |          |          |
|---------------------|-----------|-----------------------------------------------------------------------|----------|----------|
| ENSBTAG00000019337  | ACVR1C    | activin A receptor type 1C                                            | 3.23E-03 | 2.63E-01 |
| ENSBTAG00000008142  | IFIH1     | interferon induced with helicase C domain 1                           | 3.25E-03 | 2.63E-01 |
| ENSBTAG00000019954  | ABHD2#    | abhydrolase domain containing 2                                       | 3.32E-03 | 2.67E-01 |
| ENSBTAG00000001302  | MRPS28    | mitochondrial ribosomal protein S28                                   | 3.38E-03 | 2.68E-01 |
| ENSBTAG000000037581 | MZF1      | myeloid zinc finger 1                                                 | 3.46E-03 | 2.71E-01 |
| ENSBTAG00000006507  | ADAMTS3   | ADAM metallopeptidase with thrombospondin type 1 motif 3              | 3.48E-03 | 2.71E-01 |
| ENSBTAG000000020014 | CEP104    | centrosomal protein 104                                               | 3.51E-03 | 2.71E-01 |
| ENSBTAG00000005148  | PTX4      | pentraxin 4                                                           | 3.53E-03 | 2.71E-01 |
| ENSBTAG00000014502  | BRAT1     | BRCA1 associated ATM activator 1                                      | 3.64E-03 | 2.78E-01 |
| ENSBTAG00000007305  | VPS41     | VPS41, HOPS complex subunit                                           | 3.72E-03 | 2.82E-01 |
| ENSBTAG00000018638  | CC2D2A    | coiled-coil and C2 domain containing 2A                               | 3.85E-03 | 2.90E-01 |
| ENSBTAG00000008180  | SPDL1     | spindle apparatus coiled-coil protein 1                               | 3.91E-03 | 2.93E-01 |
| ENSBTAG00000018637  | HDDC3     | HD domain containing 3                                                | 3.94E-03 | 2.93E-01 |
| ENSBTAG00000013210  | ADAMTS4   | ADAM metallopeptidase with thrombospondin type 1 motif 4              | 4.23E-03 | 3.05E-01 |
| ENSBTAG00000009852  | NAV3      | neuron navigator 3                                                    | 4.40E-03 | 3.13E-01 |
| ENSBTAG00000009994  | EML5      | echinoderm microtubule associated protein like 5                      | 4.47E-03 | 3.15E-01 |
| ENSBTAG00000006925  | CENPL     | centromere protein L                                                  | 4.65E-03 | 3.24E-01 |
| ENSBTAG00000002062  | PSME4     | proteasome activator subunit 4                                        | 4.74E-03 | 3.27E-01 |
| ENSBTAG00000000382  | MED27     | mediator complex subunit 27                                           | 4.96E-03 | 3.27E-01 |
| ENSBTAG00000017296  | POLN      | DNA polymerase nu                                                     | 5.05E-03 | 3.28E-01 |
| ENSBTAG00000014940  | KCNAB3    | potassium voltage-gated channel subfamily A regulatory beta subunit 3 | 5.07E-03 | 3.28E-01 |
| ENSBTAG00000013204  | ATP13A3   | ATPase 13A3                                                           | 5.11E-03 | 3.29E-01 |
| ENSBTAG00000011516  | LRP12     | LDL receptor related protein 12                                       | 5.42E-03 | 3.43E-01 |
| ENSBTAG00000003458  | CDCA7     | cell division cycle associated 7                                      | 5.67E-03 | 3.55E-01 |
| ENSBTAG00000000959  | ZSWIM1    | zinc finger SWIM-type containing 1                                    | 5.74E-03 | 3.58E-01 |
| ENSBTAG00000038869  | ZNF383    | zinc finger protein 383                                               | 5.80E-03 | 3.58E-01 |
| ENSBTAG00000007584  | INPP1     | inositol polyphosphate-1-phosphatase                                  | 5.83E-03 | 3.58E-01 |
| ENSBTAG00000014099  | YTHDC2    | YTH domain containing 2                                               | 5.89E-03 | 3.58E-01 |
| ENSBTAG000000020296 | UBR3      | ubiquitin protein ligase E3 component n-recogin 3 (putative)          | 5.94E-03 | 3.58E-01 |
| ENSBTAG00000013112  | C7H5orf15 | chromosome 7 open reading frame, human C5orf15                        | 6.37E-03 | 3.78E-01 |
| ENSBTAG00000002715  | GMPR2     | guanosine monophosphate reductase 2                                   | 6.50E-03 | 3.78E-01 |
| ENSBTAG00000015180  | ATP6AP2   | NA                                                                    | 6.56E-03 | 3.78E-01 |
| ENSBTAG00000004933  | KLHDC2    | kelch domain containing 2                                             | 6.59E-03 | 3.78E-01 |

|                    |             |                                                                             |          |          |
|--------------------|-------------|-----------------------------------------------------------------------------|----------|----------|
| ENSBTAG00000005522 | PLSCR5      | phospholipid scramblase family member 5                                     | 6.59E-03 | 3.78E-01 |
| ENSBTAG00000015798 | UCKL1       | uridine-cytidine kinase 1 like 1                                            | 6.78E-03 | 3.85E-01 |
| ENSBTAG00000007417 | GDF11       | growth differentiation factor 11                                            | 6.87E-03 | 3.88E-01 |
| ENSBTAG00000045954 | LRRC14B     | leucine rich repeat containing 14B                                          | 6.94E-03 | 3.90E-01 |
| ENSBTAG00000012605 | GPR157      | G protein-coupled receptor 157                                              | 7.00E-03 | 3.91E-01 |
| ENSBTAG00000004540 | NUB1        | negative regulator of ubiquitin like proteins 1                             | 7.05E-03 | 3.91E-01 |
| ENSBTAG00000021336 | KIF5A       | kinesin family member 5A                                                    | 7.22E-03 | 3.95E-01 |
| ENSBTAG00000011950 | EMC1        | ER membrane protein complex subunit 1                                       | 7.37E-03 | 4.00E-01 |
| ENSBTAG00000032089 | CDC42EP2*   | CDC42 effector protein 2                                                    | 7.40E-03 | 4.00E-01 |
| ENSBTAG00000015334 | ZHX1        | zinc fingers and homeoboxes 1                                               | 7.43E-03 | 4.00E-01 |
| ENSBTAG00000015647 | CYP4X1      | cytochrome P450 4X1                                                         | 7.45E-03 | 4.00E-01 |
| ENSBTAG00000015385 | CTDSPL2     | CTD small phosphatase like 2                                                | 7.54E-03 | 4.00E-01 |
| ENSBTAG00000011413 | CCDC107     | coiled-coil domain containing 107                                           | 7.74E-03 | 4.06E-01 |
| ENSBTAG00000010427 | RASSF5      | Ras association domain family member 5                                      | 8.07E-03 | 4.17E-01 |
| ENSBTAG00000031614 | BOLL        | boule homolog, RNA binding protein                                          | 8.10E-03 | 4.17E-01 |
| ENSBTAG00000020160 | RNF138      | ring finger protein 138                                                     | 8.12E-03 | 4.17E-01 |
| ENSBTAG00000023018 | PARG        | poly(ADP-ribose) glycohydrolase                                             | 8.25E-03 | 4.22E-01 |
| ENSBTAG00000001644 | MDN1        | midasin AAA ATPase 1                                                        | 8.49E-03 | 4.32E-01 |
| ENSBTAG00000027727 | PDZPH1P     | PDZ and pleckstrin homology domains 1, pseudogene                           | 8.78E-03 | 4.39E-01 |
| ENSBTAG00000009383 | KIF11       | kinesin family member 11                                                    | 8.81E-03 | 4.39E-01 |
| ENSBTAG00000010235 | NOP9        | NOP9 nucleolar protein                                                      | 8.81E-03 | 4.39E-01 |
| ENSBTAG00000046020 | OR2F1;OR2F2 | olfactory receptor-like protein OLF3                                        | 9.05E-03 | 4.41E-01 |
| ENSBTAG00000003813 | BCS1L       | BCS1-like ( <i>S. cerevisiae</i> )                                          | 9.07E-03 | 4.41E-01 |
| ENSBTAG00000039328 | PURG        | NA                                                                          | 9.20E-03 | 4.41E-01 |
| ENSBTAG00000000611 | C25H16orf90 | chromosome 25 open reading frame, human C16orf90                            | 9.43E-03 | 4.44E-01 |
| ENSBTAG00000017711 | WHAMM       | WAS protein homolog associated with actin, golgi membranes and microtubules | 9.47E-03 | 4.44E-01 |
| ENSBTAG00000009406 | GPBP1L1     | NA                                                                          | 9.49E-03 | 4.44E-01 |
| ENSBTAG00000047868 | TMOD3       | NA                                                                          | 9.61E-03 | 4.44E-01 |
| ENSBTAG00000016152 | DAB2        | DAB2, clathrin adaptor protein                                              | 9.70E-03 | 4.45E-01 |
| ENSBTAG00000000665 | HCRT        | hypocretin neuropeptide precursor                                           | 9.77E-03 | 4.45E-01 |
| ENSBTAG00000010998 | CFLAR       | CASP8 and FADD like apoptosis regulator                                     | 9.88E-03 | 4.48E-01 |
| ENSBTAG00000007110 | RCOR3       | REST corepressor 3                                                          | 1.01E-02 | 4.49E-01 |
| ENSBTAG00000005300 | TMEM51      | transmembrane protein 51                                                    | 1.01E-02 | 4.49E-01 |

|                     |          |                                                                         |          |          |
|---------------------|----------|-------------------------------------------------------------------------|----------|----------|
| ENSBTAG0000006447   | ACSM3#   | acyl-CoA synthetase medium-chain family member 3                        | 1.01E-02 | 4.49E-01 |
| ENSBTAG00000039677  | OR2B6    | olfactory receptor, family 2, subfamily B, member 6                     | 1.01E-02 | 4.49E-01 |
| ENSBTAG0000000859   | SLC38A1  | solute carrier family 38 member 1                                       | 1.05E-02 | 4.59E-01 |
| ENSBTAG00000033041  | YIPF4    | Yip1 domain family member 4                                             | 1.05E-02 | 4.60E-01 |
| ENSBTAG00000047670  | CHST8    | carbohydrate sulfotransferase 8                                         | 1.08E-02 | 4.67E-01 |
| ENSBTAG00000019907  | WNK4     | WNK lysine deficient protein kinase 4                                   | 1.09E-02 | 4.67E-01 |
| ENSBTAG00000030520  | PROB1    | proline rich basic protein 1                                            | 1.11E-02 | 4.74E-01 |
| ENSBTAG0000003938   | FNDC1    | fibronectin type III domain-containing protein 1                        | 1.12E-02 | 4.78E-01 |
| ENSBTAG00000005293  | CDC25C   | cell division cycle 25C                                                 | 1.12E-02 | 4.78E-01 |
| ENSBTAG00000012086  | CNOT8    | CCR4-NOT transcription complex subunit 8                                | 1.13E-02 | 4.78E-01 |
| ENSBTAG00000046223  | ANAPC2   | anaphase promoting complex subunit 2                                    | 1.14E-02 | 4.80E-01 |
| ENSBTAG00000015459  | KCNA2    | potassium voltage-gated channel subfamily A member 2                    | 1.16E-02 | 4.86E-01 |
| ENSBTAG00000002086  | PRPF4B   | pre-mRNA processing factor 4B                                           | 1.19E-02 | 4.88E-01 |
| ENSBTAG00000026676  | SDC3     | syndecan 3                                                              | 1.19E-02 | 4.88E-01 |
| ENSBTAG00000008397  | ZNF555   | zinc finger protein 555                                                 | 1.20E-02 | 4.88E-01 |
| ENSBTAG00000002407  | TDRD5    | tudor domain containing 5                                               | 1.20E-02 | 4.88E-01 |
| ENSBTAG000000021360 | RASGEF1C | NA                                                                      | 1.20E-02 | 4.88E-01 |
| ENSBTAG00000005207  | COPS7B   | COP9 signalosome subunit 7B                                             | 1.24E-02 | 4.97E-01 |
| ENSBTAG00000011336  | OTOGL    | otogelin like                                                           | 1.26E-02 | 5.01E-01 |
| ENSBTAG00000047048  | DNAJC21  | NA                                                                      | 1.29E-02 | 5.09E-01 |
| ENSBTAG000000023734 | PARD6A   | par-6 family cell polarity regulator alpha                              | 1.30E-02 | 5.11E-01 |
| ENSBTAG00000012144  | ZMYND19  | zinc finger MYND-type containing 19                                     | 1.32E-02 | 5.12E-01 |
| ENSBTAG00000015230  | PLA2G12A | phospholipase A2 group XIIA                                             | 1.33E-02 | 5.14E-01 |
| ENSBTAG00000018904  | ENKD1    | enkurin domain containing 1                                             | 1.34E-02 | 5.14E-01 |
| ENSBTAG00000046142  | PRKAR1B  | NA                                                                      | 1.36E-02 | 5.16E-01 |
| ENSBTAG000000023611 | ZBTB32   | zinc finger and BTB domain containing 32                                | 1.40E-02 | 5.26E-01 |
| ENSBTAG00000018383  | ATAD5    | ATPase family, AAA domain containing 5                                  | 1.43E-02 | 5.26E-01 |
| ENSBTAG00000011635  | CENPN    | centromere protein N                                                    | 1.43E-02 | 5.26E-01 |
| ENSBTAG00000012784  | RACGAP1  | Rac GTPase activating protein 1                                         | 1.43E-02 | 5.26E-01 |
| ENSBTAG00000012753  | BRF1     | BRF1, RNA polymerase III transcription initiation factor 90 kDa subunit | 1.43E-02 | 5.26E-01 |
| ENSBTAG00000037844  | CDH18    | cadherin 18                                                             | 1.43E-02 | 5.26E-01 |
| ENSBTAG00000016740  | ACLY     | ATP citrate lyase                                                       | 1.46E-02 | 5.27E-01 |
| ENSBTAG00000026610  | SMCO3    | single-pass membrane protein with coiled-coil domains 3                 | 1.46E-02 | 5.27E-01 |

|                     |          |                                                                       |          |          |
|---------------------|----------|-----------------------------------------------------------------------|----------|----------|
| ENSBTAG00000002186  | NDN      | necdin, MAGE family member                                            | 1.47E-02 | 5.27E-01 |
| ENSBTAG000000020315 | DENND5B  | DENN domain containing 5B                                             | 1.48E-02 | 5.27E-01 |
| ENSBTAG00000006080  | MAST1    | microtubule associated serine/threonine kinase 1                      | 1.49E-02 | 5.28E-01 |
| ENSBTAG00000001044  | SUPV3L1  | Suv3 like RNA helicase                                                | 1.52E-02 | 5.33E-01 |
| ENSBTAG000000021630 | MTFMT    | mitochondrial methionyl-tRNA formyltransferase                        | 1.52E-02 | 5.33E-01 |
| ENSBTAG00000004864  | CEP89    | centrosomal protein 89                                                | 1.54E-02 | 5.34E-01 |
| ENSBTAG000000020150 | KLHDC9   | kelch domain containing 9                                             | 1.56E-02 | 5.35E-01 |
| ENSBTAG00000004316  | BOD1L1   | biorientation of chromosomes in cell division 1 like 1                | 1.56E-02 | 5.35E-01 |
| ENSBTAG000000011846 | TUT1     | terminal uridylyl transferase 1, U6 snRNA-specific                    | 1.57E-02 | 5.35E-01 |
| ENSBTAG000000025136 | MYOZ3    | myozenin 3                                                            | 1.64E-02 | 5.40E-01 |
| ENSBTAG00000003238  | MEOX2    | mesenchyme homeobox 2                                                 | 1.64E-02 | 5.40E-01 |
| ENSBTAG00000004856  | RNF130   | ring finger protein 130                                               | 1.64E-02 | 5.40E-01 |
| ENSBTAG000000014804 | HNRNPDL  | heterogeneous nuclear ribonucleoprotein D like                        | 1.65E-02 | 5.40E-01 |
| ENSBTAG000000046430 | ZNF804B  | zinc finger protein 804B                                              | 1.69E-02 | 5.44E-01 |
| ENSBTAG00000006008  | CAMSAP1  | calmodulin regulated spectrin associated protein 1                    | 1.71E-02 | 5.45E-01 |
| ENSBTAG000000013284 | SGK3     | serum/glucocorticoid regulated kinase family, member 3                | 1.71E-02 | 5.46E-01 |
| ENSBTAG000000012250 | BLOC1S6  | biogenesis of lysosomal organelles complex 1 subunit 6                | 1.72E-02 | 5.46E-01 |
| ENSBTAG000000012938 | JARID2#  | jumonji and AT-rich interaction domain containing 2                   | 1.73E-02 | 5.46E-01 |
| ENSBTAG000000004715 | AKIRIN1  | akirin 1                                                              | 1.74E-02 | 5.46E-01 |
| ENSBTAG000000036127 | AS3MT    | arsenite methyltransferase                                            | 1.75E-02 | 5.46E-01 |
| ENSBTAG000000014861 | SLC20A2  | solute carrier family 20 member 2                                     | 1.77E-02 | 5.46E-01 |
| ENSBTAG000000017128 | NUP153   | nucleoporin 153                                                       | 1.78E-02 | 5.46E-01 |
| ENSBTAG000000011324 | EMILIN1  | elastin microfibril interfacer 1                                      | 1.78E-02 | 5.46E-01 |
| ENSBTAG000000018549 | SPAG16   | NA                                                                    | 1.82E-02 | 5.46E-01 |
| ENSBTAG000000011843 | EEF1G    | eukaryotic translation elongation factor 1 gamma                      | 1.82E-02 | 5.46E-01 |
| ENSBTAG000000021180 | TBATA    | thymus, brain and testes associated                                   | 1.83E-02 | 5.46E-01 |
| ENSBTAG000000020120 | SEL1L2   | SEL1L2 ERAD E3 ligase adaptor subunit                                 | 1.84E-02 | 5.46E-01 |
| ENSBTAG000000047443 | BRDT     | NA                                                                    | 1.85E-02 | 5.46E-01 |
| ENSBTAG000000020264 | CCDC181  | coiled-coil domain containing 181                                     | 1.86E-02 | 5.46E-01 |
| ENSBTAG000000047119 | SLC29A3  | equilibrative nucleoside transporter 3-like                           | 1.87E-02 | 5.46E-01 |
| ENSBTAG000000007834 | PPP1R16A | protein phosphatase 1 regulatory subunit 16A                          | 1.95E-02 | 5.57E-01 |
| ENSBTAG000000006662 | ADAMTSL5 | NA                                                                    | 1.97E-02 | 5.59E-01 |
| ENSBTAG000000030518 | ECSCR    | endothelial cell surface expressed chemotaxis and apoptosis regulator | 1.97E-02 | 5.59E-01 |

|                    |              |                                                                     |          |          |
|--------------------|--------------|---------------------------------------------------------------------|----------|----------|
| ENSBTAG00000012615 | ZEB2         | NA                                                                  | 1.99E-02 | 5.59E-01 |
| ENSBTAG00000048087 | LOC101902869 | signal-regulatory protein beta-1 isoform 3-like                     | 2.01E-02 | 5.62E-01 |
| ENSBTAG00000009279 | TNKS2        | tankyrase 2                                                         | 2.02E-02 | 5.62E-01 |
| ENSBTAG00000018134 | AREG         | amphiregulin                                                        | 2.04E-02 | 5.63E-01 |
| ENSBTAG00000011101 | EML6         | echinoderm microtubule associated protein like 6                    | 2.05E-02 | 5.63E-01 |
| ENSBTAG00000011096 | ERGIC2       | ERGIC and golgi 2                                                   | 2.07E-02 | 5.66E-01 |
| ENSBTAG00000006612 | SCAF1        | SR-related CTD associated factor 1                                  | 2.07E-02 | 5.66E-01 |
| ENSBTAG00000046051 | IGSF10       | immunoglobulin superfamily member 10-like                           | 2.09E-02 | 5.70E-01 |
| ENSBTAG00000035662 | CAMK4        | calcium/calmodulin dependent protein kinase IV                      | 2.10E-02 | 5.71E-01 |
| ENSBTAG00000018973 | COPS3        | COP9 signalosome subunit 3                                          | 2.12E-02 | 5.73E-01 |
| ENSBTAG00000010676 | RBM44        | RNA binding motif protein 44                                        | 2.14E-02 | 5.75E-01 |
| ENSBTAG00000010351 | SNX25        | sorting nexin 25                                                    | 2.16E-02 | 5.77E-01 |
| ENSBTAG00000025191 | SKP1         | S-phase kinase associated protein 1                                 | 2.19E-02 | 5.78E-01 |
| ENSBTAG00000019492 | FANCE        | Fanconi anemia complementation group E                              | 2.22E-02 | 5.83E-01 |
| ENSBTAG00000038523 | ATP1A4       | ATPase Na <sup>+</sup> /K <sup>+</sup> transporting subunit alpha 4 | 2.24E-02 | 5.83E-01 |
| ENSBTAG00000000958 | ZSWIM3       | zinc finger SWIM-type containing 3                                  | 2.27E-02 | 5.83E-01 |
| ENSBTAG00000007933 | C1H3orf58    | chromosome 1 open reading frame, human C3orf58                      | 2.28E-02 | 5.83E-01 |
| ENSBTAG00000008390 | DNAJC10      | DnaJ heat shock protein family (Hsp40) member C10                   | 2.29E-02 | 5.83E-01 |
| ENSBTAG00000019065 | EEPD1        | endonuclease/exonuclease/phosphatase family domain containing 1     | 2.30E-02 | 5.83E-01 |
| ENSBTAG00000004873 | CCNL2        | cyclin L2                                                           | 2.31E-02 | 5.83E-01 |
| ENSBTAG00000025021 | FMN2         | formin 2                                                            | 2.31E-02 | 5.83E-01 |
| ENSBTAG00000014391 | CRB2         | crumbs 2, cell polarity complex component                           | 2.31E-02 | 5.83E-01 |
| ENSBTAG00000006158 | DZIP3        | DAZ interacting zinc finger protein 3                               | 2.32E-02 | 5.83E-01 |
| ENSBTAG00000038333 | RBM23        | RNA binding motif protein 23                                        | 2.38E-02 | 5.89E-01 |
| ENSBTAG00000033186 | OXCT1        | 3-oxoacid CoA-transferase 1                                         | 2.40E-02 | 5.89E-01 |
| ENSBTAG00000038597 | LOC528373    | putative olfactory receptor 2W6                                     | 2.41E-02 | 5.89E-01 |
| ENSBTAG00000013472 | COL1A2       | collagen type I alpha 2 chain                                       | 2.43E-02 | 5.89E-01 |
| ENSBTAG00000013060 | IQGAP1       | IQ motif containing GTPase activating protein 1                     | 2.43E-02 | 5.89E-01 |
| ENSBTAG00000010533 | HMGXB4       | HMG-box containing 4                                                | 2.44E-02 | 5.89E-01 |
| ENSBTAG00000021961 | SPR          | sepiapterin reductase (7,8-dihydrobiopterin:NADP+ oxidoreductase)   | 2.45E-02 | 5.91E-01 |
| ENSBTAG00000001947 | ZNF514       | zinc finger protein 514                                             | 2.46E-02 | 5.92E-01 |
| ENSBTAG00000010227 | CPSF2        | cleavage and polyadenylation specific factor 2                      | 2.51E-02 | 5.94E-01 |

|                    |              |                                                                                                       |          |          |
|--------------------|--------------|-------------------------------------------------------------------------------------------------------|----------|----------|
| ENSBTAG00000017799 | PITPNB       | phosphatidylinositol transfer protein beta                                                            | 2.56E-02 | 5.99E-01 |
| ENSBTAG00000017326 | OMA1         | OMA1 zinc metallopeptidase                                                                            | 2.58E-02 | 6.02E-01 |
| ENSBTAG00000005838 | ULK3         | unc-51 like kinase 3                                                                                  | 2.58E-02 | 6.02E-01 |
| ENSBTAG00000005483 | ESYT2        | extended synaptotagmin 2                                                                              | 2.63E-02 | 6.02E-01 |
| ENSBTAG00000008359 | FKBP2        | NA                                                                                                    | 2.63E-02 | 6.02E-01 |
| ENSBTAG00000005166 | CHTOP        | chromatin target of PRMT1                                                                             | 2.64E-02 | 6.02E-01 |
| ENSBTAG00000014102 | WDR77        | WD repeat domain 77                                                                                   | 2.65E-02 | 6.02E-01 |
| ENSBTAG00000021817 | C13H20orf141 | chromosome 13 C20orf141 homolog                                                                       | 2.65E-02 | 6.02E-01 |
| ENSBTAG00000012476 | NRBF2        | nuclear receptor binding factor 2                                                                     | 2.65E-02 | 6.02E-01 |
| ENSBTAG00000003506 | STEAP2       | STEAP2 metalloreductase                                                                               | 2.67E-02 | 6.02E-01 |
| ENSBTAG00000019700 | PC           | pyruvate carboxylase                                                                                  | 2.68E-02 | 6.02E-01 |
| ENSBTAG00000020407 | MTSS1        | MTSS1, I-BAR domain containing                                                                        | 2.70E-02 | 6.02E-01 |
| ENSBTAG00000017715 | HOMER2       | homer scaffolding protein 2                                                                           | 2.72E-02 | 6.02E-01 |
| ENSBTAG00000013393 | GEMIN4       | gem nuclear organelle associated protein 4                                                            | 2.72E-02 | 6.02E-01 |
| ENSBTAG00000017762 | GNG8         | G protein subunit gamma 8                                                                             | 2.74E-02 | 6.02E-01 |
| ENSBTAG00000022535 | GPR139       | G protein-coupled receptor 139                                                                        | 2.75E-02 | 6.02E-01 |
| ENSBTAG00000034225 | TAF5L        | TAF5-like RNA polymerase II p300/CBP-associated factor-associated factor 65 kDa subunit 5L pseudogene | 2.77E-02 | 6.02E-01 |
| ENSBTAG00000012780 | LPO#         | lactoperoxidase                                                                                       | 2.78E-02 | 6.02E-01 |
| ENSBTAG00000012197 | AP5Z1        | adaptor related protein complex 5 zeta 1 subunit                                                      | 2.78E-02 | 6.02E-01 |
| ENSBTAG00000008333 | ETV4         | ETS variant 4                                                                                         | 2.78E-02 | 6.02E-01 |
| ENSBTAG00000007284 | CCNA1        | cyclin A1                                                                                             | 2.78E-02 | 6.02E-01 |
| ENSBTAG00000006188 | USH2A        | usherin                                                                                               | 2.82E-02 | 6.07E-01 |
| ENSBTAG00000021064 | AKAP13       | NA                                                                                                    | 2.84E-02 | 6.07E-01 |
| ENSBTAG00000015885 | PPFIA4       | PTPRF interacting protein alpha 4                                                                     | 2.84E-02 | 6.07E-01 |
| ENSBTAG00000015669 | ADAT1        | adenosine deaminase, tRNA specific 1                                                                  | 2.84E-02 | 6.07E-01 |
| ENSBTAG00000001810 | SCAF11       | SR-related CTD associated factor 11                                                                   | 2.87E-02 | 6.07E-01 |
| ENSBTAG00000026032 | ZYG11A       | zyg-11 family member A, cell cycle regulator                                                          | 2.88E-02 | 6.07E-01 |
| ENSBTAG00000005940 | PRKAB1       | protein kinase AMP-activated non-catalytic subunit beta 1                                             | 2.88E-02 | 6.07E-01 |
| ENSBTAG00000017713 | KTN1         | kinectin 1                                                                                            | 2.89E-02 | 6.07E-01 |
| ENSBTAG00000032289 | ARHGAP15#    | Rho GTPase activating protein 15                                                                      | 2.90E-02 | 6.07E-01 |
| ENSBTAG00000000737 | DMXL2        | NA                                                                                                    | 2.91E-02 | 6.07E-01 |
| ENSBTAG00000039461 | MS4A15       | NA                                                                                                    | 2.94E-02 | 6.07E-01 |
| ENSBTAG00000016594 | PIGQ         | phosphatidylinositol glycan anchor biosynthesis class Q                                               | 2.97E-02 | 6.07E-01 |



|                     |          |                                                                                                 |          |          |
|---------------------|----------|-------------------------------------------------------------------------------------------------|----------|----------|
| ENSBTAG00000023289  | SLC26A10 | NA                                                                                              | 2.98E-02 | 6.07E-01 |
| ENSBTAG00000017482  | ISYNA1   | inositol-3-phosphate synthase 1                                                                 | 2.98E-02 | 6.07E-01 |
| ENSBTAG00000003096  | OR6K3    | olfactory receptor, family 6, subfamily K, member 3                                             | 3.03E-02 | 6.07E-01 |
| ENSBTAG00000008749  | OLIG3    | oligodendrocyte transcription factor 3                                                          | 3.05E-02 | 6.07E-01 |
| ENSBTAG00000022731  | SSR1     | signal sequence receptor subunit 1                                                              | 3.06E-02 | 6.07E-01 |
| ENSBTAG00000020385  | ALDH1B1  | aldehyde dehydrogenase 1 family member B1                                                       | 3.13E-02 | 6.07E-01 |
| ENSBTAG00000019152  | NYAP2    | NA                                                                                              | 3.14E-02 | 6.07E-01 |
| ENSBTAG00000001096  | PRKRA    | protein activator of interferon induced protein kinase EIF2AK2                                  | 3.23E-02 | 6.09E-01 |
| ENSBTAG00000046493  | PDCD6    | programmed cell death 6                                                                         | 3.23E-02 | 6.09E-01 |
| ENSBTAG00000016822  | PPIB     | peptidylprolyl isomerase B                                                                      | 3.24E-02 | 6.09E-01 |
| ENSBTAG00000038421  | NPY5R    | neuropeptide Y receptor type 5                                                                  | 3.29E-02 | 6.12E-01 |
| ENSBTAG00000004840  | C1S      | complement C1s                                                                                  | 3.31E-02 | 6.12E-01 |
| ENSBTAG00000013483  | TAF1A    | TATA-box binding protein associated factor, RNA polymerase I subunit A                          | 3.32E-02 | 6.12E-01 |
| ENSBTAG00000003625  | VSTM2A   | V-set and transmembrane domain containing 2A                                                    | 3.33E-02 | 6.12E-01 |
| ENSBTAG00000004327  | LONRF2   | NA                                                                                              | 3.34E-02 | 6.12E-01 |
| ENSBTAG00000024061  | NOTO#    | notochord homeobox                                                                              | 3.34E-02 | 6.12E-01 |
| ENSBTAG00000009641  | MTHFD1#  | methylenetetrahydrofolate dehydrogenase, cyclohydrolase and formyltetrahydrofolate synthetase 1 | 3.36E-02 | 6.12E-01 |
| ENSBTAG00000014807  | DPP8     | dipeptidyl peptidase 8                                                                          | 3.41E-02 | 6.13E-01 |
| ENSBTAG000000045787 | CDS1     | CDP-diacylglycerol synthase 1                                                                   | 3.42E-02 | 6.13E-01 |
| ENSBTAG00000018940  | CRACR2A  | calcium release activated channel regulator 2A                                                  | 3.42E-02 | 6.13E-01 |
| ENSBTAG00000018256  | SMC6     | structural maintenance of chromosomes 6                                                         | 3.44E-02 | 6.13E-01 |
| ENSBTAG00000032292  | CCDC159  | coiled-coil domain containing 159                                                               | 3.45E-02 | 6.13E-01 |
| ENSBTAG00000018889  | ATP6V0B  | ATPase H <sup>+</sup> transporting V0 subunit b                                                 | 3.46E-02 | 6.15E-01 |
| ENSBTAG00000021717  | BDKRB2   | bradykinin receptor B2                                                                          | 3.46E-02 | 6.15E-01 |
| ENSBTAG00000001271  | PLG      | plasminogen                                                                                     | 3.51E-02 | 6.16E-01 |
| ENSBTAG00000006320  | DBT      | dihydrolipoamide branched chain transacylase E2                                                 | 3.54E-02 | 6.19E-01 |
| ENSBTAG00000006346  | DAP      | death associated protein                                                                        | 3.55E-02 | 6.19E-01 |
| ENSBTAG00000017026  | DEPDC1B  | DEP domain containing 1B                                                                        | 3.56E-02 | 6.19E-01 |
| ENSBTAG00000007228  | CBX7     | chromobox 7                                                                                     | 3.57E-02 | 6.19E-01 |
| ENSBTAG00000020034  | LYN      | LYN proto-oncogene, Src family tyrosine kinase                                                  | 3.63E-02 | 6.22E-01 |
| ENSBTAG00000015386  | REL*     | REL proto-oncogene, NF-kB subunit                                                               | 3.63E-02 | 6.22E-01 |
| ENSBTAG00000047734  | C16orf58 | NA                                                                                              | 3.66E-02 | 6.22E-01 |

|                     |          |                                                                        |          |          |
|---------------------|----------|------------------------------------------------------------------------|----------|----------|
| ENSBTAG00000004660  | SPATS2   | spermatogenesis associated serine rich 2                               | 3.68E-02 | 6.25E-01 |
| ENSBTAG000000027932 | BIRC6    | baculoviral IAP repeat containing 6                                    | 3.75E-02 | 6.29E-01 |
| ENSBTAG00000001298  | STAMBPL1 | STAM binding protein like 1                                            | 3.75E-02 | 6.29E-01 |
| ENSBTAG000000047214 | TRAPP1   | trafficking protein particle complex 1                                 | 3.76E-02 | 6.29E-01 |
| ENSBTAG000000006581 | CCDC82   | coiled-coil domain containing 82                                       | 3.81E-02 | 6.33E-01 |
| ENSBTAG000000014377 | CHD3     | chromodomain helicase DNA binding protein 3                            | 3.82E-02 | 6.33E-01 |
| ENSBTAG000000034384 | VWA3B    | von Willebrand factor A domain containing 3B                           | 3.82E-02 | 6.33E-01 |
| ENSBTAG000000015742 | ICAM3    | intercellular adhesion molecule 3                                      | 3.88E-02 | 6.35E-01 |
| ENSBTAG000000046169 | CPA1     | carboxypeptidase A1                                                    | 3.92E-02 | 6.35E-01 |
| ENSBTAG000000012099 | TMEM87B  | transmembrane protein 87B                                              | 3.96E-02 | 6.35E-01 |
| ENSBTAG000000012063 | E2F4#    | E2F transcription factor 4                                             | 3.98E-02 | 6.35E-01 |
| ENSBTAG000000008338 | PLCB1    | phospholipase C beta 1                                                 | 3.99E-02 | 6.35E-01 |
| ENSBTAG000000001314 | TRMT6    | tRNA methyltransferase 6                                               | 3.99E-02 | 6.35E-01 |
| ENSBTAG000000019839 | LTBP1    | latent transforming growth factor beta binding protein 1               | 4.02E-02 | 6.35E-01 |
| ENSBTAG000000033555 | OR5D18   | olfactory receptor 5D18                                                | 4.04E-02 | 6.37E-01 |
| ENSBTAG000000016103 | CBFB     | core-binding factor beta subunit                                       | 4.05E-02 | 6.37E-01 |
| ENSBTAG000000016060 | CREM     | cAMP responsive element modulator                                      | 4.09E-02 | 6.37E-01 |
| ENSBTAG000000015252 | CHRNA9   | cholinergic receptor nicotinic alpha 9 subunit                         | 4.11E-02 | 6.37E-01 |
| ENSBTAG000000001553 | HNRNPA1  | heterogeneous nuclear ribonucleoprotein A1-like                        | 4.16E-02 | 6.40E-01 |
| ENSBTAG000000001578 | ADPGK    | ADP dependent glucokinase                                              | 4.17E-02 | 6.40E-01 |
| ENSBTAG000000005476 | METTL21A | methyltransferase like 21A                                             | 4.21E-02 | 6.40E-01 |
| ENSBTAG000000012271 | THAP2    | THAP domain containing 2                                               | 4.22E-02 | 6.40E-01 |
| ENSBTAG000000022986 | FAM19A5  | family with sequence similarity 19 member A5, C-C motif chemokine like | 4.23E-02 | 6.40E-01 |
| ENSBTAG000000011133 | AP1S3    | adaptor related protein complex 1 sigma 3 subunit                      | 4.26E-02 | 6.40E-01 |
| ENSBTAG000000001825 | SP6      | Sp6 transcription factor                                               | 4.26E-02 | 6.40E-01 |
| ENSBTAG000000047009 | ANKRD66  | ankyrin repeat domain 66                                               | 4.28E-02 | 6.41E-01 |
| ENSBTAG000000006998 | RASGRP4  | RAS guanyl releasing protein 4                                         | 4.29E-02 | 6.41E-01 |
| ENSBTAG000000010234 | DHRS1    | dehydrogenase/reductase 1                                              | 4.31E-02 | 6.41E-01 |
| ENSBTAG000000003257 | STK4     | serine/threonine kinase 4                                              | 4.33E-02 | 6.41E-01 |
| ENSBTAG000000008952 | RAP1GAP  | RAP1 GTPase activating protein                                         | 4.33E-02 | 6.41E-01 |
| ENSBTAG000000044132 | NTN5     | netrin 5                                                               | 4.34E-02 | 6.41E-01 |
| ENSBTAG000000037461 | SDHAF1   | succinate dehydrogenase complex assembly factor 1                      | 4.34E-02 | 6.41E-01 |
| ENSBTAG000000010627 | SF3B3    | splicing factor 3b subunit 3                                           | 4.35E-02 | 6.41E-01 |

|                    |             |                                                                                  |          |          |
|--------------------|-------------|----------------------------------------------------------------------------------|----------|----------|
| ENSBTAG00000019130 | FAM149B1    | family with sequence similarity 149 member B1                                    | 4.35E-02 | 6.41E-01 |
| ENSBTAG00000021051 | ZNHIT6      | zinc finger HIT-type containing 6                                                | 4.35E-02 | 6.41E-01 |
| ENSBTAG00000012039 | PHACTR1     | phosphatase and actin regulator 1                                                | 4.37E-02 | 6.41E-01 |
| ENSBTAG00000014809 | ANXA6       | annexin A6                                                                       | 4.40E-02 | 6.42E-01 |
| ENSBTAG00000013982 | UACA        | uveal autoantigen with coiled-coil domains and ankyrin repeats                   | 4.41E-02 | 6.42E-01 |
| ENSBTAG00000006740 | SCYL1       | SCY1 like pseudokinase 1                                                         | 4.44E-02 | 6.42E-01 |
| ENSBTAG00000008409 | MYC#        | v-myc avian myelocytomatosis viral oncogene homolog                              | 4.45E-02 | 6.42E-01 |
| ENSBTAG00000038476 | HIST2H2AB   | histone cluster 2, H2ab                                                          | 4.45E-02 | 6.42E-01 |
| ENSBTAG00000040497 | LIN28A      | lin-28 homolog A                                                                 | 4.48E-02 | 6.42E-01 |
| ENSBTAG00000004409 | IVD         | isovaleryl-CoA dehydrogenase                                                     | 4.51E-02 | 6.44E-01 |
| ENSBTAG00000048315 | OR2C3       | olfactory receptor 2C3                                                           | 4.51E-02 | 6.44E-01 |
| ENSBTAG00000018399 | MYH15       | myosin heavy chain 15                                                            | 4.53E-02 | 6.44E-01 |
| ENSBTAG00000008541 | MGST1       | microsomal glutathione S-transferase 1                                           | 4.53E-02 | 6.44E-01 |
| ENSBTAG00000001343 | DEPDC1      | DEP domain-containing protein 1A                                                 | 4.55E-02 | 6.44E-01 |
| ENSBTAG00000011176 | TPRKB       | TP53RK binding protein                                                           | 4.56E-02 | 6.44E-01 |
| ENSBTAG00000036222 | NINL        | ninein like                                                                      | 4.59E-02 | 6.44E-01 |
| ENSBTAG00000017361 | BAG5        | BCL2 associated athanogene 5                                                     | 4.60E-02 | 6.44E-01 |
| ENSBTAG00000022751 | ZCWPW2      | zinc finger CW-type and PWWP domain containing 2                                 | 4.61E-02 | 6.44E-01 |
| ENSBTAG00000020533 | FBXO34      | F-box protein 34                                                                 | 4.62E-02 | 6.44E-01 |
| ENSBTAG00000010984 | CDKN2AIPNL  | CDKN2A interacting protein N-terminal like                                       | 4.63E-02 | 6.44E-01 |
| ENSBTAG00000033345 | STAR        | steroidogenic acute regulatory protein                                           | 4.66E-02 | 6.44E-01 |
| ENSBTAG00000005909 | LEPROT      | leptin receptor overlapping transcript                                           | 4.70E-02 | 6.44E-01 |
| ENSBTAG00000017894 | CAD         | carbamoyl-phosphate synthetase 2, aspartate transcarbamylase, and dihydroorotase | 4.70E-02 | 6.44E-01 |
| ENSBTAG00000033961 | RNF217      | NA                                                                               | 4.80E-02 | 6.49E-01 |
| ENSBTAG00000002233 | CPNE2       | copine 2                                                                         | 4.81E-02 | 6.49E-01 |
| ENSBTAG00000012143 | TECPR2      | tectonin beta-propeller repeat containing 2                                      | 4.81E-02 | 6.49E-01 |
| ENSBTAG00000017992 | CD164       | CD164 molecule                                                                   | 4.81E-02 | 6.49E-01 |
| ENSBTAG00000013369 | COL14A1     | collagen type XIV alpha 1 chain                                                  | 4.82E-02 | 6.49E-01 |
| ENSBTAG00000021653 | TRIP12      | thyroid hormone receptor interactor 12                                           | 4.83E-02 | 6.49E-01 |
| ENSBTAG00000014587 | CAGE1       | cancer antigen 1                                                                 | 4.83E-02 | 6.49E-01 |
| ENSBTAG00000021931 | C19H17orf49 | chromosome 19 open reading frame, human C17orf49                                 | 4.89E-02 | 6.49E-01 |
| ENSBTAG00000035710 | ZBBX        | NA                                                                               | 4.90E-02 | 6.49E-01 |
| ENSBTAG00000019454 | ANGEL1      | angel homolog 1                                                                  | 4.93E-02 | 6.50E-01 |

|                    |        |                                     |          |          |
|--------------------|--------|-------------------------------------|----------|----------|
| ENSBTAG00000039190 | SLC9A5 | solute carrier family 9 member A5   | 4.95E-02 | 6.50E-01 |
| ENSBTAG0000003895  | CYBA   | cytochrome b-245, alpha polypeptide | 4.96E-02 | 6.50E-01 |

---

**Table S15| Enrichment analysis of positively selected genes and rapidly evolving genes in giraffe.** Items with  $p$ -value < 0.05 based on the accumulative hypergeometric distribution are listed.

| Category                | ID         | Description                                                              | Input | InGO | $p$ -value |
|-------------------------|------------|--------------------------------------------------------------------------|-------|------|------------|
| KEGG Pathway            | hsa04350   | TGF-beta signaling pathway                                               | 6     | 67   | 4.86E-03   |
| KEGG Pathway            | hsa04713   | Circadian entrainment                                                    | 6     | 68   | 8.80E-03   |
| GO Biological Processes | GO:1903055 | positive regulation of extracellular matrix organization                 | 5     | 21   | 3.38E-05   |
| GO Biological Processes | GO:1901724 | positive regulation of cell proliferation involved in kidney development | 3     | 8    | 3.29E-04   |
| GO Biological Processes | GO:0048545 | response to steroid hormone                                              | 17    | 386  | 9.41E-04   |
| GO Biological Processes | GO:0014841 | skeletal muscle satellite cell proliferation                             | 3     | 14   | 1.97E-03   |
| GO Biological Processes | GO:0071560 | cellular response to transforming growth factor beta stimulus            | 12    | 247  | 2.31E-03   |
| GO Biological Processes | GO:0030431 | sleep                                                                    | 4     | 34   | 3.46E-03   |
| GO Biological Processes | GO:0001841 | neural tube formation                                                    | 7     | 106  | 3.59E-03   |
| GO Biological Processes | GO:0072073 | kidney epithelium development                                            | 8     | 142  | 5.03E-03   |
| GO Biological Processes | GO:0045777 | positive regulation of blood pressure                                    | 4     | 38   | 5.19E-03   |
| GO Biological Processes | GO:0060393 | regulation of pathway-restricted SMAD protein phosphorylation            | 5     | 62   | 5.78E-03   |
| GO Biological Processes | GO:0050772 | positive regulation of axonogenesis                                      | 6     | 88   | 5.87E-03   |
| GO Biological Processes | GO:0035089 | establishment of apical/basal cell polarity                              | 3     | 21   | 6.53E-03   |
| GO Biological Processes | GO:0051321 | meiotic cell cycle                                                       | 11    | 251  | 7.39E-03   |
| GO Biological Processes | GO:0060538 | skeletal muscle organ development                                        | 8     | 167  | 1.28E-02   |
| GO Biological Processes | GO:0007423 | sensory organ development                                                | 18    | 554  | 1.57E-02   |
| GO Biological Processes | GO:0070306 | lens fiber cell differentiation                                          | 3     | 29   | 1.61E-02   |
| GO Biological Processes | GO:0046488 | phosphatidylinositol metabolic process                                   | 8     | 177  | 1.76E-02   |
| GO Biological Processes | GO:0043583 | ear development                                                          | 9     | 224  | 2.42E-02   |
| GO Biological Processes | GO:0021955 | central nervous system neuron axonogenesis                               | 3     | 35   | 2.66E-02   |
| GO Biological Processes | GO:0045494 | photoreceptor cell maintenance                                           | 3     | 39   | 3.52E-02   |
| GO Biological Processes | GO:0030239 | myofibril assembly                                                       | 4     | 68   | 3.73E-02   |

|                         |            |                                                           |    |     |          |
|-------------------------|------------|-----------------------------------------------------------|----|-----|----------|
| GO Biological Processes | GO:0090184 | positive regulation of kidney development                 | 3  | 40  | 3.75E-02 |
| GO Biological Processes | GO:0001990 | regulation of systemic arterial blood pressure by hormone | 3  | 40  | 3.75E-02 |
| GO Biological Processes | GO:0048568 | embryonic organ development                               | 14 | 445 | 3.87E-02 |
| GO Biological Processes | GO:0019226 | transmission of nerve impulse                             | 4  | 70  | 4.08E-02 |
| GO Cellular Components  | GO:0044420 | extracellular matrix component                            | 6  | 54  | 4.73E-04 |
| GO Cellular Components  | GO:0062023 | collagen-containing extracellular matrix                  | 17 | 410 | 1.79E-03 |
| GO Cellular Components  | GO:0019897 | extrinsic component of plasma membrane                    | 9  | 161 | 3.16E-03 |
| GO Cellular Components  | GO:0016607 | nuclear speck                                             | 16 | 400 | 3.43E-03 |
| GO Cellular Components  | GO:0035770 | ribonucleoprotein granule                                 | 11 | 231 | 4.02E-03 |
| GO Cellular Components  | GO:0031012 | extracellular matrix                                      | 19 | 535 | 5.48E-03 |
| GO Cellular Components  | GO:0000151 | ubiquitin ligase complex                                  | 12 | 286 | 7.36E-03 |
| GO Cellular Components  | GO:0097730 | non-motile cilium                                         | 8  | 155 | 8.39E-03 |
| GO Cellular Components  | GO:0036464 | cytoplasmic ribonucleoprotein granule                     | 10 | 221 | 8.41E-03 |
| GO Molecular Functions  | GO:0008017 | microtubule binding                                       | 12 | 255 | 2.99E-03 |
| GO Molecular Functions  | GO:0004386 | helicase activity                                         | 9  | 161 | 3.16E-03 |
| GO Molecular Functions  | GO:0004935 | adrenergic receptor activity                              | 3  | 19  | 4.89E-03 |
| GO Molecular Functions  | GO:0015631 | tubulin binding                                           | 14 | 347 | 5.57E-03 |
| GO Molecular Functions  | GO:0003779 | actin binding                                             | 16 | 431 | 6.93E-03 |

---

**Table S16| Rapidly evolving KEGG pathways in giraffe.** Items with one-sided binomial test  $p$ -value  $< 0.05$  are listed.

| KEGG ID | Pathway name                                              | Ka/Ks  | Giraffe                           |                               | Ka/Ks  | Okapi                             |                               | $p$ -value |
|---------|-----------------------------------------------------------|--------|-----------------------------------|-------------------------------|--------|-----------------------------------|-------------------------------|------------|
|         |                                                           |        | Count of non-synonymous mutations | Count of synonymous mutations |        | Count of non-synonymous mutations | Count of synonymous mutations |            |
| KO03440 | Homologous recombination                                  | 0.3550 | 212.4077                          | 204.8451                      | 0.2001 | 119.7886                          | 204.9760                      | 5.07E-08   |
| KO04640 | Hematopoietic cell lineage                                | 0.1933 | 115.3414                          | 205.4346                      | 0.1093 | 72.2523                           | 227.6775                      | 8.24E-06   |
| KO04120 | Ubiquitin mediated proteolysis                            | 0.0869 | 141.1208                          | 574.9287                      | 0.0545 | 102.8639                          | 668.5956                      | 9.44E-06   |
| KO04611 | Platelet activation                                       | 0.0745 | 228.5750                          | 946.0458                      | 0.0529 | 174.7762                          | 1019.4728                     | 3.87E-05   |
| KO04672 | Intestinal immune network for IgA production              | 0.1686 | 37.6197                           | 72.6479                       | 0.0706 | 19.0205                           | 87.7510                       | 4.46E-05   |
| KO04916 | Melanogenesis                                             | 0.0518 | 93.8550                           | 527.4902                      | 0.0331 | 58.8743                           | 518.4286                      | 2.92E-04   |
| KO05020 | Prion diseases                                            | 0.1384 | 76.4692                           | 164.4975                      | 0.0809 | 47.5508                           | 174.9695                      | 4.40E-04   |
| KO05323 | Rheumatoid arthritis                                      | 0.1079 | 65.4284                           | 208.3265                      | 0.0635 | 48.1639                           | 260.5973                      | 7.81E-04   |
| KO05150 | Staphylococcus aureus infection                           | 0.1981 | 71.3655                           | 111.3588                      | 0.1168 | 62.9234                           | 166.4817                      | 1.37E-03   |
| KO04610 | Complement and coagulation cascades                       | 0.2612 | 222.0129                          | 267.2578                      | 0.1943 | 225.6995                          | 365.1684                      | 3.07E-03   |
| KO00512 | Mucin type O-glycan biosynthesis                          | 0.1110 | 36.6999                           | 108.5663                      | 0.0620 | 28.8192                           | 152.6217                      | 3.58E-03   |
| KO05140 | Leishmaniasis                                             | 0.1301 | 69.5575                           | 174.2262                      | 0.0886 | 63.4450                           | 233.4643                      | 9.44E-03   |
| KO04964 | Proximal tubule bicarbonate reclamation                   | 0.0669 | 24.8972                           | 117.5277                      | 0.0380 | 18.8614                           | 156.6845                      | 1.43E-02   |
| KO04961 | Endocrine and other factor-regulated calcium reabsorption | 0.0469 | 42.1161                           | 267.7459                      | 0.0308 | 32.0577                           | 310.1165                      | 1.84E-02   |
| KO00020 | Citrate cycle (TCA cycle)                                 | 0.0761 | 39.8000                           | 172.4155                      | 0.0516 | 33.2013                           | 211.9826                      | 3.09E-02   |
| KO05133 | Pertussis                                                 | 0.1091 | 69.3256                           | 198.7527                      | 0.0802 | 72.9693                           | 284.7039                      | 3.91E-02   |
| KO04261 | Adrenergic signaling in cardiomyocytes                    | 0.0433 | 104.2171                          | 716.1187                      | 0.0342 | 81.7561                           | 711.7708                      | 4.01E-02   |

**Table S17| Genes containing most unique substitutions (more than 3 sites) at functional domains in giraffe among all ruminants.** The “Gene ID” column represents the gene ids in cattle (*Bos taurus*).

| Gene ID            | Gene symbol      | Number of unique substitutions |
|--------------------|------------------|--------------------------------|
| ENSBTAG00000027464 | <i>FGFRL1*</i>   | 7                              |
| ENSBTAG00000031209 | <i>SLC22A4</i>   | 6                              |
| ENSBTAG00000009641 | <i>MTHFD1*</i>   | 6                              |
| ENSBTAG00000015170 | <i>LCT</i>       | 6                              |
| ENSBTAG00000015405 | <i>DCHS1</i>     | 6                              |
| ENSBTAG00000010229 | <i>LAMA2</i>     | 6                              |
| ENSBTAG00000017452 | <i>RCAN3*</i>    | 5                              |
| ENSBTAG00000001444 | <i>TNXB</i>      | 5                              |
| ENSBTAG00000037566 | <i>ZNF500</i>    | 5                              |
| ENSBTAG00000020725 | <i>CNGA2</i>     | 4                              |
| ENSBTAG00000025424 | <i>NOTCH4*</i>   | 4                              |
| ENSBTAG00000011032 | <i>MCPHI</i>     | 4                              |
| ENSBTAG00000006050 | <i>BOLA1</i>     | 3                              |
| ENSBTAG00000011613 | <i>PLS3</i>      | 3                              |
| ENSBTAG00000032289 | <i>ARHGAP15*</i> | 3                              |
| ENSBTAG00000003275 | <i>ANK1</i>      | 3                              |
| ENSBTAG00000006507 | <i>ADAMTS3</i>   | 3                              |
| ENSBTAG00000008373 | <i>ITGA10*</i>   | 3                              |
| ENSBTAG00000014903 | <i>ABCA3</i>     | 3                              |
| ENSBTAG00000016525 | <i>ITGA1</i>     | 3                              |
| ENSBTAG00000012808 | <i>MASP2</i>     | 3                              |
| ENSBTAG00000018912 | <i>ARHGEF1</i>   | 3                              |
| ENSBTAG00000007237 | <i>BUB1B</i>     | 3                              |
| ENSBTAG00000014112 | <i>EXOC4</i>     | 3                              |
| ENSBTAG00000019492 | <i>FANCE</i>     | 3                              |
| ENSBTAG00000000988 | <i>BRCA2</i>     | 3                              |
| ENSBTAG00000019807 | <i>COL27A1</i>   | 3                              |
| ENSBTAG00000018010 | <i>ABCA4</i>     | 3                              |
| ENSBTAG00000012925 | <i>NCAPH</i>     | 3                              |
| ENSBTAG00000017122 | <i>HSPG2</i>     | 3                              |
| ENSBTAG00000021125 | <i>NUP160</i>    | 3                              |
| ENSBTAG00000039346 | <i>ALPP</i>      | 3                              |
| ENSBTAG00000010077 | <i>FANCD2</i>    | 3                              |

\* represents genes among the 70 highly divergent genes in giraffe reported by the previous study (7).



**Table S18| 63 uniquely lost genes in giraffe compared to okapi.**

| Chromosome<br>in cattle | Gene ID of cattle  | CDS length<br>(bp) | Lost length in<br>giraffe (bp) | Lost length<br>in okapi (bp) | Gene symbol      |
|-------------------------|--------------------|--------------------|--------------------------------|------------------------------|------------------|
| 1                       | ENSBTAG00000022908 | 978                | 943                            | 0                            | <i>OR5H2</i>     |
| 1                       | ENSBTAG00000016306 | 399                | 217                            | 0                            | <i>PFDN4</i>     |
| 4                       | ENSBTAG00000033359 | 405                | 263                            | 0                            | <i>HIST1H2BC</i> |
| 5                       | ENSBTAG00000021122 | 936                | 863                            | 0                            | <i>OR6C2</i>     |
| 6                       | ENSBTAG00000038214 | 927                | 705                            | 0                            | <i>SULT1D1</i>   |
| 7                       | ENSBTAG00000040610 | 939                | 508                            | 0                            | <i>OR5W2</i>     |
| 7                       | ENSBTAG00000046397 | 993                | 788                            | 0                            | <i>OR7A5</i>     |
| 7                       | ENSBTAG00000045623 | 1,035              | 1,035                          | 0                            | <i>OR2T27</i>    |
| 10                      | ENSBTAG00000009039 | 972                | 969                            | 0                            | <i>OR4K5</i>     |
| 10                      | ENSBTAG00000039370 | 921                | 900                            | 0                            | <i>OR4K1</i>     |
| 10                      | ENSBTAG00000046009 | 954                | 954                            | 0                            | <i>OR4F21</i>    |
| 10                      | ENSBTAG00000046370 | 915                | 915                            | 0                            | <i>OR4K15</i>    |
| 10                      | ENSBTAG00000047566 | 939                | 939                            | 0                            | <i>OR4K15</i>    |
| 10                      | ENSBTAG00000038188 | 939                | 916                            | 0                            | <i>OR4F6</i>     |
| 10                      | ENSBTAG00000013255 | 981                | 981                            | 0                            | <i>OR4F17</i>    |
| 10                      | ENSBTAG00000046207 | 936                | 845                            | 0                            | <i>OR4F21</i>    |
| 10                      | ENSBTAG00000047465 | 933                | 557                            | 0                            | <i>OR4F21</i>    |
| 11                      | ENSBTAG00000045514 | 441                | 352                            | 0                            | <i>IGKV1D-13</i> |
| 14                      | ENSBTAG00000048001 | 957                | 649                            | 0                            | <i>OR5D13</i>    |
| 15                      | ENSBTAG00000046894 | 612                | 612                            | 0                            | <i>OR10A6</i>    |
| 15                      | ENSBTAG00000048176 | 933                | 929                            | 0                            | <i>OR</i>        |
| 15                      | ENSBTAG00000037603 | 951                | 480                            | 0                            | <i>OR6</i>       |
| 15                      | ENSBTAG00000038031 | 936                | 896                            | 0                            | <i>OR</i>        |
| 15                      | ENSBTAG00000023912 | 972                | 972                            | 0                            | <i>OR52N4</i>    |
| 15                      | ENSBTAG00000038637 | 942                | 942                            | 0                            | <i>OR51I2</i>    |
| 15                      | ENSBTAG00000039088 | 951                | 951                            | 0                            | <i>OR51I2</i>    |
| 15                      | ENSBTAG00000037992 | 966                | 752                            | 0                            | <i>OR51Q1</i>    |
| 15                      | ENSBTAG00000019544 | 942                | 923                            | 0                            | <i>OR51I1</i>    |
| 15                      | ENSBTAG00000012546 | 942                | 915                            | 0                            | <i>OR4C13</i>    |
| 15                      | ENSBTAG00000031119 | 927                | 907                            | 0                            | <i>OR4S1</i>     |
| 15                      | ENSBTAG00000012549 | 936                | 525                            | 0                            | <i>OR4C3</i>     |
| 15                      | ENSBTAG00000031032 | 930                | 875                            | 0                            | <i>OR4C12</i>    |
| 15                      | ENSBTAG00000030909 | 849                | 811                            | 0                            | <i>OR4C12</i>    |
| 15                      | ENSBTAG00000039821 | 984                | 588                            | 0                            | <i>OR4C13</i>    |
| 15                      | ENSBTAG00000046923 | 939                | 760                            | 0                            | <i>OR140</i>     |
| 15                      | ENSBTAG00000040425 | 930                | 745                            | 0                            | <i>OR5W2</i>     |
| 15                      | ENSBTAG00000040341 | 930                | 930                            | 0                            | <i>OR5W2</i>     |
| 15                      | ENSBTAG00000005624 | 909                | 909                            | 0                            | <i>OR5W2</i>     |
| 15                      | ENSBTAG00000007944 | 945                | 907                            | 0                            | <i>OR5I1</i>     |

|    |                    |       |       |   |                                          |
|----|--------------------|-------|-------|---|------------------------------------------|
| 15 | ENSBTAG00000014594 | 978   | 861   | 0 | <i>OR10AG1</i>                           |
| 15 | ENSBTAG00000046471 | 945   | 837   | 0 | <i>OR5F1</i>                             |
| 15 | ENSBTAG00000023511 | 957   | 872   | 0 | <i>OR5F1</i>                             |
| 15 | ENSBTAG00000048141 | 963   | 959   | 0 | <i>OR10AG1</i>                           |
| 15 | ENSBTAG00000005874 | 957   | 957   | 0 | <i>OR5F1</i>                             |
| 15 | ENSBTAG00000035988 | 942   | 663   | 0 | <i>OR8K3</i>                             |
| 15 | ENSBTAG00000045723 | 942   | 893   | 0 | <i>OR8K3</i>                             |
| 15 | ENSBTAG00000046167 | 945   | 916   | 0 | <i>OR5J2</i>                             |
| 15 | ENSBTAG00000024952 | 945   | 943   | 0 | <i>OR5AK2</i>                            |
| 17 | ENSBTAG00000046986 | 1,215 | 985   | 0 | <i>PRAME</i>                             |
| 18 | ENSBTAG00000030440 | 357   | 328   | 0 | <i>ZNF738</i>                            |
| 18 | ENSBTAG00000037710 | 1,353 | 1,054 | 0 | <i>ZNF267</i>                            |
| 20 | ENSBTAG00000047333 | 990   | 843   | 0 | <i>OR5D13</i>                            |
| 20 | ENSBTAG00000004920 | 210   | 113   | 0 | <i>COX8A</i>                             |
| 22 | ENSBTAG00000045666 | 942   | 667   | 0 | <i>OR5D13</i>                            |
| 22 | ENSBTAG00000023918 | 909   | 908   | 0 | <i>Vomeronal<br/>type-1 receptor</i>     |
| 22 | ENSBTAG00000017173 | 975   | 975   | 0 | <i>vomeronal type-<br/>1 receptor 90</i> |
| 23 | ENSBTAG00000000228 | 948   | 579   | 0 | <i>OR2B8</i>                             |
| 26 | ENSBTAG00000023549 | 1,473 | 1,093 | 0 | <i>CYP2C19</i>                           |
| 26 | ENSBTAG00000005267 | 942   | 787   | 0 | <i>OR13A1</i>                            |
| 28 | ENSBTAG00000011707 | 981   | 961   | 0 | <i>OR5AS1</i>                            |
| 29 | ENSBTAG00000039676 | 969   | 528   | 0 | <i>OR8A1</i>                             |
| X  | ENSBTAG00000047194 | 372   | 372   | 0 | <i>TRMT112</i>                           |
| X  | ENSBTAG00000025952 | 525   | 512   | 0 | <i>OBP</i>                               |

---

**Table S19| KEGG pathway and GO enrichment of expanded gene families in giraffe.** Items with Fisher's exact test FDR (Benjamini-Hochberg method) value < 0.05 are listed.

| <b>Database</b> | <b>Terms</b> | <b>Function</b>                   | <b>FDR value</b> |
|-----------------|--------------|-----------------------------------|------------------|
| KEGG Pathway    | bta05322     | Systemic lupus erythematosus      | 3.98E-13         |
| KEGG Pathway    | bta00982     | Drug metabolism - cytochrome P450 | 5.44E-06         |
| KEGG Pathway    | bta04970     | Salivary secretion                | 5.77E-05         |
| KEGG Pathway    | bta04971     | Gastric acid secretion            | 3.61E-03         |
| Gene Ontology   | GO:0042742   | Defense response to bacterium     | 4.40E-10         |

**Table S20| KEGG pathway and GO enrichment of contracted gene families in giraffe.** Items with Fisher's exact test FDR (Benjamini-Hochberg method) value < 0.05 are listed.

| <b>Database</b> | <b>Terms</b> | <b>Function</b>                        | <b>FDR value</b> |
|-----------------|--------------|----------------------------------------|------------------|
| KEGG Pathway    | bta04740     | Olfactory transduction                 | 2.26E-208        |
| KEGG Pathway    | bta00730     | Thiamine metabolism                    | 0.020897         |
| KEGG Pathway    | bta04540     | Gap junction                           | 0.039595         |
| Gene Ontology   | GO:0004984   | olfactory receptor activity            | 5.79E-76         |
| Gene Ontology   | GO:0004930   | G protein-coupled receptor activity    | 6.06E-61         |
| Gene Ontology   | GO:0042221   | response to chemical                   | 4.67E-18         |
| Gene Ontology   | GO:0005200   | structural constituent of cytoskeleton | 0.000816         |
| Gene Ontology   | GO:0051716   | cellular response to stimulus          | 0.001911         |
| Gene Ontology   | GO:0005549   | odorant binding                        | 0.002393         |

**Table S21| The oligonucleotides used for sgRNA expression vectors.**

| <b>Item</b>      | <b>Name</b>          | <b>Sequence</b>               |
|------------------|----------------------|-------------------------------|
| Targeting site 1 | M- FGFRL1-EA-gRNA up | 5'-TAGGCTCAAGTGTGTGGCCAGT-3'  |
|                  | M- FGFRL1-EA-gRNA dw | 5'-AAACACTGGCCACACACTTGAG-3'  |
| Targeting site 2 | M- FGFRL1-EB-gRNA up | 5'-TAGGTGGAGTTGTGGCGTCCCT-3'  |
|                  | M- FGFRL1-EB-gRNA dw | 5'-AAACAGGGACGCCACA ACTCCA-3' |

**Table S22| Primers used for amplifying and sequencing CRISPR/Cas9-induced mutations in mice.**

| <b>Location</b>   | <b>Name</b>   | <b>Sequence (5'-3')</b> | <b>Amplicon</b> |
|-------------------|---------------|-------------------------|-----------------|
| <b>Upstream</b>   | M- Rrm1-EA-F1 | GAGTTCAGTTCCCAGCAACC    | 1,346 bp        |
|                   | M- Rrm1-EA-R1 | CCTCCTACTCACACCAACAGG   |                 |
| <b>Downstream</b> | M-FGFRL1-DwF1 | GGTGGACTTCGGTGGGACAA    | 959 bp          |
|                   | M-FGFRL1-DwR1 | ATGCTGGTGTTGATGAACCTTGC |                 |

## REFERENCES AND NOTES

1. E. Z. Cameron, J. T. du Toit, Winning by a neck: Tall giraffes avoid competing with shorter browsers. *Am. Nat.* **169**, 130–135 (2007).
2. J. P. Coimbra, N. S. Hart, S. P. Collin, P. R. Manger, Scene from above: Retinal ganglion cell topography and spatial resolving power in the giraffe (*Giraffa camelopardalis*). *J. Comp. Neurol.* **521**, 2042–2057 (2013).
3. G. Mitchell, J. D. Skinner, An allometric analysis of the giraffe cardiovascular system. *Comp. Biochem. Physiol. A Mol. Integr. Physiol.* **154**, 523–529 (2009).
4. E. Brondum, J. M. Hasenkam, N. H. Secher, M. F. Bertelsen, C. Grondahl, K. K. Petersen, R. Buhl, C. Aalkjaer, U. Baandrup, H. Nygaard, M. Smerup, F. Stegmann, E. Sloth, K. H. Ostergaard, P. Nissen, M. Runge, K. Pitsillides, T. Wang, Jugular venous pooling during lowering of the head affects blood pressure of the anesthetized giraffe. *Am. J. Physiol. Regul. Integr. Comp. Physiol.* **297**, R1058–R1065 (2009).
5. H. L. More, S. M. O'Connor, E. Brondum, T. Wang, M. F. Bertelsen, C. Grondahl, K. Kastberg, A. Horlyck, J. Funder, J. M. Donelan, Sensorimotor responsiveness and resolution in the giraffe. *J. Exp. Biol.* **216**, 1003–1011 (2013).
6. H. Endo, D. Yamagiwa, M. Fujisawa, J. Kimura, M. Kurohmaru, Y. Hayashi, Modified neck muscular system of the giraffe (*Giraffa camelopardalis*). *Ann. Anat.* **179**, 481–485 (1997).
7. M. Agaba, E. Ishengoma, W. C. Miller, B. C. McGrath, C. N. Hudson, O. C. Bedoya Reina, A. Ratan, R. Burhans, R. Chikhi, P. Medvedev, C. A. Praul, L. Wu-Cavener, B. Wood, H. Robertson, L. Penfold, D. R. Cavener, Giraffe genome sequence reveals clues to its unique morphology and physiology. *Nat. Commun.* **7**, 11519 (2016).
8. S. Mallick, S. Gnerre, P. Muller, D. Reich, The difficulty of avoiding false positives in genome scans for natural selection. *Genome Res.* **19**, 922–933 (2009).

9. L. Chen, Q. Qiu, Y. Jiang, K. Wang, Z. Lin, Z. Li, F. Bibi, Y. Yang, J. Wang, W. Nie, W. Su, G. Liu, Q. Li, W. Fu, X. Pan, C. Liu, J. Yang, C. Zhang, Y. Yin, Y. Wang, Y. Zhao, C. Zhang, Z. Wang, Y. Qin, W. Liu, B. Wang, Y. Ren, R. Zhang, Y. Zeng, R. R. da Fonseca, B. Wei, R. Li, W. Wan, R. Zhao, W. Zhu, Y. Wang, S. Duan, Y. Gao, Y. E. Zhang, C. Chen, C. Hvilsom, C. W. Epps, L. G. Chemnick, Y. Dong, S. Mirarab, H. R. Siegismund, O. A. Ryder, M. T. P. Gilbert, H. A. Lewin, G. Zhang, R. Heller, W. Wang, Large-scale ruminant genome sequencing provides insights into their evolution and distinct traits. *Science* **364**, eaav6202 (2019).
10. E. E. Eichler, D. Sankoff, Structural dynamics of eukaryotic chromosome evolution. *Science* **301**, 793–797 (2003).
11. H. Cernohorska, S. Kubickova, O. Kopecna, A. I. Kulemzina, P. L. Perelman, F. F. B. Elder, T. J. Robinson, A. S. Graphodatsky, J. Rubes, Molecular cytogenetic insights to the phylogenetic affinities of the giraffe (*Giraffa camelopardalis*) and pronghorn (*Antilocapra americana*). *Chromosome Res.* **21**, 447–460 (2013).
12. Z. Yang, PAML: A program package for phylogenetic analysis by maximum likelihood. *Comput. Appl. Biosci.* **13**, 555–556 (1997).
13. W. H. Gharib, M. Robinson-Rechavi, The branch-site test of positive selection is surprisingly robust but lacks power under synonymous substitution saturation and variation in GC. *Mol. Biol. Evol.* **30**, 1675–1686 (2013).
14. C. Catela, D. Bilbao-Cortes, E. Slonimsky, P. Kratsios, N. Rosenthal, P. Te Welscher, Multiple congenital malformations of Wolf-Hirschhorn syndrome are recapitulated in *Fgfr1* null mice. *Dis. Model. Mech.* **2**, 283–294 (2009).
15. H. Engbers, J. J. van der Smagt, R. van't Slot, J. R. Vermeesch, R. Hochstenbach, M. Poot, Wolf-Hirschhorn syndrome facial dysmorphic features in a patient with a terminal 4p16.3 deletion telomeric to the WHSCR and WHSCR 2 regions. *Eur. J. Hum. Genet.* **17**, 129–132 (2009).
16. X. Pan, Y. Shao, F. Wu, Y. Wang, R. Xiong, J. Zheng, H. Tian, B. Wang, Y. Wang, Y. Zhang, Z. Han, A. Qu, H. Xu, A. Lu, T. Yang, X. Li, A. Xu, J. Du, Z. Lin, FGF21 prevents angiotensin



II-induced hypertension and vascular dysfunction by activation of ACE2/angiotensin-(1-7) axis in mice. *Cell Metab.* **27**, 1323–1337.e5 (2018).

17. T. Niu, N. Liu, M. Zhao, G. Xie, L. Zhang, J. Li, Y. F. Pei, H. Shen, X. Fu, H. He, S. Lu, X. D. Chen, L. J. Tan, T. L. Yang, Y. Guo, P. J. Leo, E. L. Duncan, J. Shen, Y. F. Guo, G. C. Nicholson, R. L. Prince, J. A. Eisman, G. Jones, P. N. Sambrook, X. Hu, P. M. Das, Q. Tian, X. Z. Zhu, C. J. Papasian, M. A. Brown, A. G. Uitterlinden, Y. P. Wang, S. Xiang, H. W. Deng, Identification of a novel FGFRL1 MicroRNA target site polymorphism for bone mineral density in meta-analyses of genome-wide association studies. *Hum. Mol. Genet.* **24**, 4710–4727 (2015).
18. S. C. F. Rawlinson, D. H. Murray, J. R. Mosley, C. D. P. Wright, J. C. Breidl, L. K. Saxon, N. Loveridge, C. Leterrier, P. Constantin, C. Farquharson, A. A. Pitsillides, Genetic selection for fast growth generates bone architecture characterised by enhanced periosteal expansion and limited consolidation of the cortices but a diminution in the early responses to mechanical loading. *Bone* **45**, 357–366 (2009).
19. O. L. van Schalkwyk, J. D. Skinner, G. Mitchell, A comparison of the bone density and morphology of giraffe (*Giraffa camelopardalis*) and buffalo (*Syncerus caffer*) skeletons. *J. Zool.* **264**, 307–315 (1999).
20. M. Damkjaer, T. Wang, E. Brondum, K. H. Ostergaard, U. Baandrup, A. Horlyck, J. M. Hasenkam, M. Smerup, J. Funder, N. Marcussen, C. C. Danielsen, M. F. Bertelsen, C. Grondahl, M. Pedersen, P. Agger, G. Candy, C. Aalkjaer, P. Bie, The giraffe kidney tolerates high arterial blood pressure by high renal interstitial pressure and low glomerular filtration rate. *Acta Physiol. (Oxf.)* **214**, 497–510 (2015).
21. M. J. Maxwell, S. M. Dopheide, S. J. Turner, S. P. Jackson, Shear induces a unique series of morphological changes in translocating platelets: Effects of morphology on translocation dynamics. *Arterioscler. Thromb. Vasc. Biol.* **26**, 663–669 (2006).
22. S. F. Jackson, S. M. Schoenwaelder, Type I phosphoinositide 3-kinases: Potential antithrombotic targets? *Cell. Mol. Life Sci.* **63**, 1085–1090 (2006).

23. Z. Xu, J. Wu, J. Xin, Y. Feng, G. Hu, J. Shen, M. Li, Y. Zhang, H. Xiao, L. Wang,  $\beta_3$ -adrenergic receptor activation induces TGF $\beta$ 1 expression in cardiomyocytes via the PKG/JNK/c-Jun pathway. *Biochem. Biophys. Res. Commun.* **503**, 146–151 (2018).
24. B. Zhang, M. Li, L. Wang, C. Li, Y. Lou, J. Liu, Y. Liu, Z. Wang, S. Wen, The association between the polymorphisms in a sodium channel gene SCN7A and essential hypertension: A case-control study in the Northern Han Chinese. *Ann. Hum. Genet.* **79**, 28–36 (2015).
25. G. Grassi, S. Padmanabhan, C. Menni, G. Seravalle, W. K. Lee, M. Bombelli, G. Brambilla, F. Quarti-Trevano, C. Giannattasio, G. Cesana, A. Dominiczak, G. Mancia, Association between ADRA1A gene and the metabolic syndrome: Candidate genes and functional counterpart in the PAMELA population. *J. Hypertens.* **29**, 1121–1127 (2011).
26. M. Muszkat, D. Kurnik, J. Solus, G. G. Sofowora, H.-G. Xie, L. Jiang, C. McMunn, P. Ihrie, J. R. Harris, E. P. Dawson, S. M. Williams, A. J. J. Wood, C. M. Stein, Variation in the alpha2B-adrenergic receptor gene (ADRA2B) and its relationship to vascular response in vivo. *Pharmacogenet. Genomics* **15**, 407–414 (2005).
27. M. Hara-Chikuma, A. S. Verkman, Aquaporin-1 facilitates epithelial cell migration in kidney proximal tubule. *J. Am. Soc. Nephrol.* **17**, 39–45 (2006).
28. D. Gordienko, O. Povstyan, K. Sukhanova, M. Raphaël, M. Harhun, Y. Dyskina, V. Lehen'kyi, A. Jama, Z.-L. Lu, R. Skryma, N. Prevarskaya, Impaired P2X signalling pathways in renal microvascular myocytes in genetic hypertension. *Cardiovasc. Res.* **105**, 131–142 (2015).
29. G. Tian, C. Dang, Z. Lu, The change and significance of the Na<sup>+</sup>-K<sup>+</sup>-ATPase alpha-subunit in ouabain-hypertensive rats. *Hypertens. Res.* **24**, 729–734 (2001).
30. K. C. Ehrlich, M. Lacey, M. Ehrlich, Tissue-specific epigenetics of atherosclerosis-related ANGPT and ANGPTL genes. *Epigenomics* **11**, 169–186 (2019).
31. H. Li, H. Cai, J. Deng, X. Tu, Y. Sun, Z. Huang, Z. Ding, L. Dong, J. Chen, Y. Zang, J. Zhang, TGF- $\beta$ -mediated upregulation of Sox9 in fibroblast promotes renal fibrosis. *Biochim. Biophys. Acta. Mol. Basis Dis.* **1864**, 520–532 (2018).

32. E. M. Williams, Giraffe stature and neck elongation: Vigilance as an evolutionary mechanism. *Biology (Basel)* **5**, 35 (2016).
33. C. C. Veilleux, E. C. Kirk, Visual acuity in mammals: Effects of eye size and ecology. *Brain Behav. Evol.* **83**, 43–53 (2014).
34. P. Mathur, J. Yang, Usher syndrome: Hearing loss, retinal degeneration and associated abnormalities. *Biochim. Biophys. Acta* **1852**, 406–420 (2015).
35. D. Backhaus, Experimentelle Prüfung des Farbsehvermögens einer Massai-Giraffe (*Giraffa camelopardalis tippelskirchi* Matschie 1898). *Ethology* **16**, 468–477 (1959).
36. S. Nummela, H. Pihlstrom, K. Puolamaki, M. Fortelius, S. Hemila, T. Reuter, Exploring the mammalian sensory space: Co-operations and trade-offs among senses. *J. Comp. Physiol. A Neuroethol. Sens. Neural Behav. Physiol.* **199**, 1077–1092 (2013).
37. J. M. Siegel, Clues to the functions of mammalian sleep. *Nature* **437**, 1264–1271 (2005).
38. A. C. Liu, D. K. Welsh, C. H. Ko, H. G. Tran, E. E. Zhang, A. A. Priest, E. D. Buhr, O. Singer, K. Meeker, I. M. Verma, F. J. Doyle III, J. S. Takahashi, S. A. Kay, Intercellular coupling confers robustness against mutations in the SCN circadian clock network. *Cell* **129**, 605–616 (2007).
39. L. I. Kiyashchenko, B. Y. Mileykovskiy, N. Maidment, H. A. Lam, M. F. Wu, J. John, J. Peever, J. M. Siegel, Release of hypocretin (orexin) during waking and sleep states. *J. Neurosci.* **22**, 5282–5286 (2002).
40. K. Marten, P. Marler, Sound transmission and its significance for animal vocalization: I. Temperate habitats. *Behav. Ecol. Sociobiol.* **2**, 271–290 (1977).
41. J. Ruan, H. Li, Fast and accurate long-read assembly with wtdbg2. *Nat. Methods* **17**, 155–158 (2020).
42. R. Vaser, I. Sovic, N. Nagarajan, M. Sikic, Fast and accurate de novo genome assembly from long uncorrected reads. *Genome Res.* **27**, 737–746 (2017).

43. B. J. Walker, T. Abeel, T. Shea, M. Priest, A. Abouelliel, S. Sakthikumar, C. A. Cuomo, Q. D. Zeng, J. Wortman, S. K. Young, A. M. Earl, Pilon: An integrated tool for comprehensive microbial variant detection and genome assembly improvement. *PLOS ONE* **9**, e112963 (2014).
44. N. C. Durand, M. S. Shamim, I. Machol, S. S. Rao, M. H. Huntley, E. S. Lander, E. L. Aiden, Juicer provides a one-click system for analyzing loop-resolution Hi-C experiments. *Cell Syst.* **3**, 95–98 (2016).
45. O. Dudchenko, S. S. Batra, A. D. Omer, S. K. Nyquist, M. Hoeger, N. C. Durand, M. S. Shamim, I. Machol, E. S. Lander, A. P. Aiden, E. L. Aiden, De novo assembly of the *Aedes aegypti* genome using Hi-C yields chromosome-length scaffolds. *Science* **356**, 92–95 (2017).
46. F. A. Simao, R. M. Waterhouse, P. Ioannidis, E. V. Kriventseva, E. M. Zdobnov, BUSCO: Assessing genome assembly and annotation completeness with single-copy orthologs. *Bioinformatics* **31**, 3210–3212 (2015).
47. L. Huang, A. Nesterenko, W. Nie, J. Wang, W. Su, A. S. Graphodatsky, F. Yang, Karyotype evolution of giraffes (*Giraffa camelopardalis*) revealed by cross-species chromosome painting with Chinese muntjac (*Muntiacus reevesi*) and human (*Homo sapiens*) paints. *Cytogenet. Genome Res.* **122**, 132–138 (2008).
48. Benson, G., Tandem repeats finder: A program to analyze DNA sequences. *Nucleic Acids Res.* **27**, 573–580 (1999).
49. J. A. Bedell, I. Korf, W. Gish, MaskerAid: A performance enhancement to RepeatMasker. *Bioinformatics* **16**, 1040–1041 (2000).
50. M. Stanke, S. Waack, Gene prediction with a hidden Markov model and a new intron submodel. *Bioinformatics* **19**, ii215–ii225 (2003).
51. C. Burge, S. Karlin, Prediction of complete gene structures in human genomic DNA. *J. Mol. Biol.* **268**, 78–94 (1997).

52. S. F. Altschul, W. Gish, W. Miller, E. W. Myers, D. J. Lipman, Basic local alignment search tool. *J. Mol. Biol.* **215**, 403–410 (1990).
53. E. Birney, M. Clamp, R. Durbin, GeneWise and genomewise. *Genome Res.* **14**, 988–995 (2004).
54. B. J. Haas, S. L. Salzberg, W. Zhu, M. Pertea, J. E. Allen, J. Orvis, O. White, C Robin Buell, J. R. Wortman, Automated eukaryotic gene structure annotation using EVIDENCEModeler and the Program to Assemble Spliced Alignments. *Genome Biol.* **9**, R7 (2008).
55. E. M. Zdobnov, R. Apweiler, InterProScan—An integration platform for the signature-recognition methods in InterPro. *Bioinformatics* **17**, 847–848 (2001).
56. J. Fennessy, T. Bidon, F. Reuss, V. Kumar, P. Elkan, M. A. Nilsson, M. Vamberger, U. Fritz, A. Janke, Multi-locus analyses reveal four giraffe species instead of one. *Curr. Biol.* **26**, 2543–2549 (2016).
57. S. Kumar, G. Stecher, K. Tamura, MEGA7: Molecular evolutionary genetics analysis version 7.0 for bigger datasets. *Mol. Biol. Evol.* **33**, 1870–1874 (2016).
58. B. Q. Minh, H. A. Schmidt, O. Chernomor, D. Schrempf, M. D. Woodhams, A. von Haeseler, R. Lanfear, IQ-TREE 2: New models and efficient methods for phylogenetic inference in the genomic era. *Mol. Biol. Evol.* **37**, 1530–1534 (2020).
59. J. Kim, M. Farre, L. Auvil, B. Capitanu, D. M. Larkin, J. Ma, H. A. Lewin, Reconstruction and evolutionary history of eutherian chromosomes. *Proc. Natl. Acad. Sci. U.S.A.* **114**, E5379–E5388 (2017).
60. S. M. Kielbasa, R. Wan, K. Sato, P. Horton, M. C. Frith, Adaptive seeds tame genomic sequence comparison. *Genome Res.* **21**, 487–493 (2011).
61. M. Blanchette, W. J. Kent, C. Riemer, L. Elnitski, A. F. Smit, K. M. Roskin, R. Baertsch, K. Rosenbloom, H. Clawson, E. D. Green, D. Haussler, W. Miller, Aligning multiple genomic sequences with the threaded blockset aligner. *Genome Res.* **14**, 708–715 (2004).

62. Y. Zhou, B. Zhou, L. Pache, M. Chang, A. H. Khodabakhshi, O. Tanaseichuk, C. Benner, S. K. Chanda, Metascape provides a biologist-oriented resource for the analysis of systems-level datasets. *Nat. Commun.* **10**, 1523 (2019).
63. L. Li, C. J. Stoeckert Jr., D. S. Roos, OrthoMCL: Identification of ortholog groups for eukaryotic genomes. *Genome Res.* **13**, 2178–2189 (2003).
64. T. De Bie, N. Cristianini, J. P. Demuth, M. W. Hahn, CAFE: A computational tool for the study of gene family evolution. *Bioinformatics* **22**, 1269–1271 (2006).
65. C. Xie, X. Mao, J. Huang, Y. Ding, J. Wu, S. Dong, L. Kong, G. Gao, C. Y. Li, L. Wei, KOBAS 2.0: A web server for annotation and identification of enriched pathways and diseases. *Nucleic Acids Res.* **39**, W316–W322 (2011).
66. K. Wang, Y. Shen, Y. Yang, X. Gan, G. Liu, K. Hu, Y. Li, Z. Gao, L. Zhu, G. Yan, L. He, X. Shan, L. Yang, S. Lu, H. Zeng, X. Pan, C. Liu, Y. Yuan, C. Feng, W. Xu, C. Zhu, W. Xiao, Y. Dong, W. Wang, Q. Qiu, S. He, Morphology and genome of a snailfish from the Mariana Trench provide insights into deep-sea adaptation. *Nat. Ecol. Evol.* **3**, 823–833 (2019).
67. S. El-Gebali, J. Mistry, A. Bateman, S. R. Eddy, A. Luciani, S. C. Potter, M. Qureshi, L. J. Richardson, G. A. Salazar, A. Smart, E. L. L. Sonnhammer, L. Hirsh, L. Paladin, D. Piovesan, S. C. E. Tosatto, R. D. Finn, The Pfam protein families database in 2019. *Nucleic Acids Res.* **47**, D427–D432 (2019).
68. H. Li, B. Handsaker, A. Wysoker, T. Fennell, J. Ruan, N. Homer, G. Marth, G. Abecasis, R. Durbin, S. Genome The sequence Alignment/Map format and SAMtools. *Bioinformatics* **25**, 2078–2079 (2009).
69. G. Chen, Y. Liu, R. Goetz, L. Fu, S. Jayaraman, M.-C. Hu, O. W. Moe, G. Liang, X. Li, M. Mohammadi,  $\alpha$ -Klotho is a non-enzymatic molecular scaffold for FGF23 hormone signalling. *Nature* **553**, 461–466 (2018).
70. J. Pei, M. Tang, N. V. Grishin, PROMALS3D web server for accurate multiple protein sequence and structure alignments. *Nucleic Acids Res.* **36**, W30–W34 (2008).

71. Y. Song, F. DiMaio, R. Y.-R. Wang, D. Kim, C. Miles, T. Brunette, J. Thompson, D. Baker, High-resolution comparative modeling with RosettaCM. *Structure* **21**, 1735–1742 (2013).
72. D. A. Case, T. E. Cheatham III, T. Darden, H. Gohlke, R. Luo, K. M. Merz, Jr., A. Onufriev, C. Simmerling, B. Wang, R. J. Woods, The Amber biomolecular simulation programs. *J. Comput. Chem.* **26**, 1668–1688 (2005).
73. J. A. Maier, C. Martinez, K. Kasavajhala, L. Wickstrom, K. E. Hauser, C. Simmerling, ff14SB: Improving the accuracy of protein side chain and backbone parameters from ff99SB. *J. Chem. Theory Comput.* **11**, 3696–3713 (2015).
74. M. Farre, Q. Li, I. Darolti, Y. Zhou, J. Damas, A. A. Proskuryakova, A. I. Kulemzina, L. G. Chemnick, J. Kim, O. A. Ryder, J. Ma, A. S. Graphodatsky, G. Zhang, D. M. Larkin, H. A. Lewin, An integrated chromosome-scale genome assembly of the Masai giraffe (*Giraffa camelopardalis tippelskirchi*). *Gigascience* **8** (2019).
75. I. Letunic, P. Bork, 20 years of the SMART protein domain annotation resource. *Nucleic Acids Res.* **46**, D493–D496 (2018).
76. H. Li, Minimap and miniasm: Fast mapping and de novo assembly for noisy long sequences. *Bioinformatics* **32**, 2103–2110 (2016).
